# Supplementary material for: Psychometric properties of the Arabic version of EPDS and BDI-II as a screening tool for antenatal depression: evidence from Qatar
Source: PubMed Central journal article supplement — BMJ Open. 2019 Sep 13;9(9):e030365. doi: 10.1136/bmjopen-2019-030365 (PMC6747648; doi:10.1136/bmjopen-2019-030365), 2019-09-13
Supplement: bmjopen-2019-030365.draft_revisions.pdf [file bmjopen-2019-030365.draft_revisions.pdf]

# BMJ Open

BMJ Open is committed to open peer review. As part of this commitment we make the peer review history of every article we publish publicly available.

When an article is published we post the peer reviewers' comments and the authors' responses online. We also post the versions of the paper that were used during peer review. These are the versions that the peer review comments apply to.

The versions of the paper that follow are the versions that were submitted during the peer review process. They are not the versions of record or the final published versions. They should not be cited or distributed as the published version of this manuscript.

BMJ Open is an open access journal and the full, final, typeset and author-corrected version of record of the manuscript is available on our site with no access controls, subscription charges or pay-per-view fees (<http://bmjopen.bmj.com>).

If you have any questions on BMJ Open's open peer review process please email [info.bmjopen@bmj.com](mailto:info.bmjopen@bmj.com)

# BMJ Open

## Screening for Antenatal Depression: A Validation Study from a High-Income Arab Country

|                               |                                                                                                                                                                                                                                                                                                                   |
|-------------------------------|-------------------------------------------------------------------------------------------------------------------------------------------------------------------------------------------------------------------------------------------------------------------------------------------------------------------|
| Journal:                      | <i>BMJ Open</i>                                                                                                                                                                                                                                                                                                   |
| Manuscript ID                 | bmjopen-2019-030365                                                                                                                                                                                                                                                                                               |
| Article Type:                 | Research                                                                                                                                                                                                                                                                                                          |
| Date Submitted by the Author: | 11-Mar-2019                                                                                                                                                                                                                                                                                                       |
| Complete List of Authors:     | Naja, Sarah; Hamad Medical Corp, Community Medicine<br>Al-Kubaisi, Noura; Primary Health Care Corp<br>Chehab, Mohamad; Hamad Medical Corp, Community Medicine<br>Al-Dahshan, Ayman; Hamad Medical Corp, Community Medicine<br>Abo Hashem, Nada ; Hamad Medical Corp<br>Bougmiza , Iheb ; Primary Health Care Corp |
| Keywords:                     | MENTAL HEALTH, antenatal depression, validation studies, Edinburgh Postnatal Depression Scale, Beck Depression Inventory-II, Mini International Neuropsychiatric Interview                                                                                                                                        |
|                               |                                                                                                                                                                                                                                                                                                                   |

SCHOLARONE™  
Manuscripts

1  
2  
3 **Screening for Antenatal Depression: A Validation Study from a High-Income Arab**  
4  
5 **Country**  
6

7 Sarah Naja <sup>(1)\*</sup>, Noora Al Kubaisi <sup>(2)</sup>, Mohamad Chehab <sup>(1)</sup>, Ayman Al Dahshan <sup>(1)</sup>, Nada

8  
9  
10 Abo Hashem <sup>(1)</sup>, Iheb Bougmiza <sup>(2)</sup>  
11

12 (1): Hamad Medical Corporation, Doha, Qatar; [dr.sj.naja@gmail.com](mailto:dr.sj.naja@gmail.com);

13  
14 [Mchehab2@hamad.qa](mailto:Mchehab2@hamad.qa), [aadahshan@hamad.qa](mailto:aadahshan@hamad.qa); [nadaadli@outlook.com](mailto:nadaadli@outlook.com)  
15  
16

17 (2): Primary Health Care Corporation, Doha, Qatar; [nalkubaisi@phcc.gov.qa](mailto:nalkubaisi@phcc.gov.qa);

18  
19 [mbougmiza@phcc.gov.qa](mailto:mbougmiza@phcc.gov.qa)  
20  
21

22 **\*Correspondence:** Dr. Sarah Naja, Community Medicine Residency Program,

23  
24 Department of Medical Education, Hamad Medical Corporation, Doha, Qatar. P.O. Box

25  
26 3050; [dr.sj.naja@gmail.com](mailto:dr.sj.naja@gmail.com)  
27  
28

29  
30 Word count: 2369  
31  
32  
33  
34  
35  
36  
37  
38  
39  
40  
41  
42  
43  
44  
45  
46  
47  
48  
49  
50  
51  
52  
53  
54  
55  
56  
57  
58  
59  
60

## Abstract

**Objectives:** This study aimed to validate and determine the psychometric properties of the Beck Depression Inventory-II (BDI-II) and Edinburgh Postnatal Depression Scale (EPDS) in Qatar.

**Design:** A cross-sectional study design was employed.

**Setting:** The antenatal care (ANC) clinics at primary health care centers.

**Participants:** Women (n=128), in different trimesters of pregnancy, attending the ANC clinics as well as capable of reading and writing in the Arabic language.

**Results:** A total of 128 participants were interviewed. Upon conducting the receiver operating characteristic (ROC) analysis, the EPDS showed a larger area under the curve at 0.951 than the BDI-II tool (0.912). Using Youden's index, a score  $\geq 13$  on the EPDS (87% sensitivity, 82% specificity) and  $\geq 19$  on the BDI-II (96% sensitivity, 73% specificity) allowed for the greatest division between depressed and non-depressed participants.

**Conclusion:** To address the under-recognition of antenatal depression, physicians at primary health care centers in Qatar should be encouraged to utilize the EPDS or BDI-II to screen pregnant women seeking antenatal care services.

### Strengths and limitations of this study

- This was the first study in the State of Qatar to identify the most suitable screening tool for AD.
- The sample in the current study was derived from a heterogeneous population of pregnant women across the country.
- The examined screening tools in the study were compared with the golden standard (MINI) tool.
- One of the limitations in this study was the inability to use the Structured Clinical Interview for DSM-5 (SCID-5) as a tool for diagnosing antenatal depression.

1  
2  
3 **Keywords:** mental health; antenatal depression; validation studies; Edinburgh Postnatal  
4  
5 Depression Scale; Beck Depression Inventory-II; Mini International Neuropsychiatric  
6  
7 Interview  
8  
9  
10  
11  
12  
13  
14  
15  
16  
17  
18  
19  
20  
21  
22  
23  
24  
25  
26  
27  
28  
29  
30  
31  
32  
33  
34  
35  
36  
37  
38  
39  
40  
41  
42  
43  
44  
45  
46  
47  
48  
49  
50  
51  
52  
53  
54  
55  
56  
57  
58  
59  
60

## INTRODUCTION

Globally, maternal mental health problems are considered as a major public health challenge with depression affecting 10% of pregnant women.<sup>1, 2</sup> The figures are even higher in the Arab Gulf countries, where antenatal depression (AD) was estimated to impact more than half (57.5%) of expecting mothers in Saudi Arabia and almost a quarter (24%) in Oman during 2016.<sup>3, 4</sup> However, pregnant women with mental disorders can be managed through effective and low-cost interventions after being properly screened by their health care providers.<sup>5, 6</sup>

The United States Preventive Services Task Force (USPSTF) encourages the identification of AD through screening all gravid women at the primary health care level, given the fact that AD is a serious, prevalent, and treatable disease (B recommendation). Nevertheless, there is a lack of strong evidence on the best screening tool to be employed; where the relevant cut-off points have varied from one population to another.<sup>7, 8</sup>

In 2017, a systematic review compared seven AD screening tools including the Edinburgh Postnatal Depression Scale (EPDS), Beck Depression Index (BDI-II), Centre for Epidemiologic Studies Depression Scale (CES-D), Hamilton Rating Scale for Depression (HRSD), Hopkins Symptoms Checklist (HSCL), Kessler Psychological Distress Scale (K10), and Self-Reporting Questionnaire (SRQ). The review concluded that the EPDS was the most suitable AD screening tool in low-resource settings due to its superior level of accuracy and sensitivity.<sup>9</sup>

Several researchers argue that the inclusion of constitutional symptoms (e.g. changes in sleeping pattern and food habits) in the screening of AD is unmerited because they are uninformative and non-specific (common in normal pregnancy). Thus, their use may overestimate the actual burden of the disease. On the other hand, some scholars indicate that somatic symptoms are valid indicators of depression during pregnancy.<sup>10, 11</sup> Similarly, the decision to include or exclude the aforementioned symptoms is crucial for decision-makers as

1  
2  
3 it will affect their choice of the most effective screening tool. Thus, some experts advocate  
4 the use of the EPDS which does not encompass any questions about somatic complaints,  
5 while others prefer the BDI-II that includes such symptoms.<sup>12, 13</sup>  
6  
7

8  
9  
10 Given the ease of administering self-report measures in the clinical and research settings, the  
11 identification of an optimal cut-off point could be a key consideration when screening  
12 pregnant women. Furthermore, the adequate determination of this threshold in the screening  
13 process is necessary to decrease the false positive and false negative rates. The literature  
14 reveals that different cut-off points were used among different populations to distinguish  
15 between depressed and non-depressed pregnant women. For example, a cut-off value of  $\geq 10$   
16 was employed in Korea,  $\geq 11$  was utilized in Nigeria, and  $\geq 13$  was used elsewhere.<sup>14-17</sup> This  
17 indicates that there is no international agreement on a specific cut-off value for AD.  
18  
19

20  
21  
22 In the State of Qatar, the population is heterogeneous and multilingual but the official  
23 language is Arabic. In addition to that, there is lack of evidence regarding the most accurate  
24 tool for AD screening among pregnant women in the country. Thus, the objective of this  
25 study was to compare the performance of the two screening tools, the EPDS and BDI-II,  
26 among pregnant women while benchmarking them with the semi-structured Mini-  
27 International Neuropsychiatric Interview (MINI) tool.  
28  
29

## 30 31 32 **METHODS**

### 33 34 35 **Study design and setting**

36  
37  
38 This was a cross-sectional study conducted among pregnant women attending the antenatal  
39 clinics of the Primary Health Care Corporation (PHCC) in Qatar between August and  
40 September of 2018. The primary health centers are the first line of contact between pregnant  
41 women and the healthcare system in the country. A random sampling technique was  
42 employed through random number generation to select nine health centres from the existing  
43  
44  
45  
46  
47  
48  
49  
50  
51  
52  
53  
54  
55  
56  
57  
58  
59  
60

1  
2  
3 twenty-three health centers at the time of the study. In each selected health center, all eligible  
4  
5 clients attending the antenatal clinic were invited to participate.  
6  
7

### 8 **Participants**

9  
10 In order to validate the screening tools in question and identify the best performing one, the  
11  
12 sample size for the current validation study was based on previously published  
13  
14 literature.<sup>18, 19</sup> To be included in the study, the participants had to be pregnant women,  
15  
16 capable of reading and writing in the Arabic language, and granting a written consent. There  
17  
18 was no restriction to specific trimesters.  
19  
20  
21

### 22 **Research protocol**

23  
24 The pregnant women who met the inclusion criteria were first informed about the study and  
25  
26 its objectives. If consent was given, the participants would receive guiding instructions from  
27  
28 trained data collectors and asked to complete the Arabic version of the EPDS and BDI-II  
29  
30 before conducting their antenatal care consult. After which, the participants would undergo  
31  
32 the Mini-International Neuropsychiatric Interview (MINI) by their primary care physician  
33  
34 during their scheduled antenatal care visit. The aforementioned physicians were blinded to  
35  
36 the results of the self-administrated tools collected earlier. The assessment of the respondents  
37  
38 through the three tools occurred during the same visit. Patients who were diagnosed positive  
39  
40 for AD through MINI tool were referred to specialised secondary care for further evaluation  
41  
42 and management.  
43  
44  
45  
46  
47  
48

### 49 **Data collection tools**

- 50  
51  
52
- 53 • The Edinburgh Postnatal Depression Scale (EPDS) is a self-administrated tool and was  
54 first published in the British Journal of Psychiatry during 1987. It consists of 10 items and  
55 has been validated for use in different populations.<sup>20</sup>  
56  
57  
58  
59  
60



- The Beck Depression Inventory (BDI-II), first introduced in 1961, is a brief 10-minutes self-administered questionnaire that can detect the presence of depressive symptoms. It consists of 21 questions pertaining to the various aspects of mood such as sadness, suicidal ideation, loss of weight, and social withdrawal.<sup>21</sup>
- The Mini-International Neuropsychiatric Interview (MINI) is a short, diagnostic, and structured interview that is used for diagnosing major Axis I psychiatric disorders in DSM-V and ICD-10. <sup>(22)</sup> The MINI tool was employed and validated through several studies, particularly for diagnosing depression disorders.<sup>23-24</sup>

### **Translation process**

Two bilingual English-Arabic clinicians separately translated the EPDS and BDI-II into Arabic. Then, the two translated versions were reviewed and a final draft was made. After which, the draft was back-translated into English by each of the two clinicians. Then, the yielded versions were compared and a few minor revisions were proposed. Subsequently, the Arabic version was piloted on a sample of twenty pregnant women to check to ascertain that it was clear and understandable to participants. The data from the pilot sample was excluded from the analysis of the validation study.

### **Statistical analysis**

The receiver operating characteristic (ROC) analysis was employed to measure the accuracy of the EPDS and BDI-II in diagnosing major depression according to DSM-V criteria. Youden's index was used to determinate the best cut-off points for antenatal depression screening. Cronbach's alpha ( $\alpha$ ) was used as an estimate of scale reliability, internal consistency, and item homogeneity. The analysis was conducted using the Statistical Package for the Social Sciences (SPSS v.23) based on a preset significant level of 0.05.

## **RESULTS**

### Psychometric properties of the scales

### 3.1 Reliability measures

The internal consistency of the EPDS and BDI-II scales was  $\alpha = 0.865$  and  $0.90$  respectively. Using Lawshe's method, an expert panel of three clinicians evaluated the questionnaire for the necessity of items, their grammar, wording, and scaling. The necessity of each item was assessed using a 3-point rating scale: (a) not necessary, (b) useful but not essential, and (c) essential. The universal agreement between the three ratters was 78% for the EPDS (intra-class correlation coefficient  $0.78$  [CI  $0.16-0.94$ ]) and 59% for the BDI-II (intra-class correlation coefficient  $0.59$ [CI  $0.033-0.9$ ]).

#### 3.2.1 Validity

Using ROC analysis, the area under the curve was calculated at  $0.951$  (SE= $0.02$ ; 95%CI= $0.91-0.99$ ) for EPDS and  $0.912$  (SE= $0.025$ ; 95%CI= $0.86-0.96$ ) for BDI (Figure 1).

#### 3.2.2 Cut-offs

Using Youden's index, the following cut-off scores were determined: A score  $\geq 13$  on the EPDS (87% sensitivity, 82% specificity) and  $\geq 19$  on the BDI-II (96% sensitivity, 73% specificity) (Table 1).

#### 3.2.3 Correlation

The correlation established between EPDS and BDI-II was 60%, which represent a weak uphill linear correlation (Figure 2).

#### 3.2.4 Construct validity

Principle component analyses (PCA) was conducted for the EPDS and BDI-II scales (Figure 3). The analysis suggested that two components of the EPDS explain most of the variance with a cumulative percentage of 58%. The two components were item 2 (sadness) and item 8 (optimism). The convergent construct validity of EPDS was demonstrated through a rotated component matrix of  $0.75$ , which is acceptable and significant ( $p=0.01$ ). Discriminant validity was supported because no violations were seen in the correlation matrix. Also, the

scree plot of the BDI-II suggests that four components explain most of the variance with a cumulative percentage of 65.2%. These four factors were item 7 (self-dislike), item 2 (pessimistic), item 3 (past failure), and item 6 (punishment feeling). The convergent construct validity of the BDI-II was weak as seen through a rotated component matrix of 0.45. No violations were noted in the correlation matrix, hence supporting discriminant validity. The Kaiser-Meyer-Olkin (KMO) values were considered for measuring sampling adequacy for each factor analysis and it showed to be 0.872 ( $p < 0.001$ ).

**Table 1:** The psychometric properties of the EPDS and BDI-II Scales'

|        | Cut-off   | Sensitivity | Specificity | Corrected classified | LR+  | LR-    | Youden's index |
|--------|-----------|-------------|-------------|----------------------|------|--------|----------------|
| EPDS   | $\geq 8$  | 96%         | 64%         | 46.2%                | 2.66 | 0.062  | 60%            |
|        | $\geq 9$  | 96%         | 68%         | 49.2%                | 3    | 0.0058 | 64%            |
|        | $\geq 10$ | 96%         | 76%         | 55.6%                | 4    | 0.0052 | 72%            |
|        | $\geq 11$ | 90%         | 83%         | 62.2%                | 5.29 | 0.12   | 73%            |
|        | $\geq 12$ | 87%         | 88%         | 69.2%                | 7.25 | 0.15   | 75%            |
|        | $\geq 13$ | 87%         | 90%         | 77.1%                | 8.7  | 0.14   | 77%            |
|        | $\geq 14$ | 71%         | 99%         | 84.6%                | 17.3 | 0.29   | 71%            |
| BDI-II | $\geq 18$ | 96%         | 63%         | 46%                  | 2.59 | 0.063  | 59%            |
|        | $\geq 19$ | 96%         | 73%         | 51.7%                | 3.5  | 0.05   | 69%            |
|        | $\geq 20$ | 90%         | 76%         | 53.8%                | 3.75 | 0.13   | 66%            |
|        | $\geq 21$ | 90%         | 77%         | 54%                  | 3.9  | 0.12   | 67%            |
|        | $\geq 22$ | 80%         | 80%         | 55.6%                | 4    | 0.25   | 60%            |
|        | $\geq 23$ | 74%         | 82%         | 56.1%                | 4.1  | 0.31   | 56%            |
|        | $\geq 24$ | 67%         | 84%         | 56.8%                | 4.18 | 0.39   | 51%            |

*Note:* EPDS: Edinburgh Postnatal Depression Scale; BDI-II: Beck Depression Inventory; LR: Likelihood ratio

## DISCUSSION

Pregnant women should be screened for antenatal depression using an appropriate scale relevant to the local context. Overall, the findings of the current study showed that all the tested screening tools were valid for detecting AD among pregnant women in the country.

1  
2  
3 Similarly, the two instruments demonstrated narrow confidence intervals. Moreover, the  
4 positive predictive values yielded by the EPDS (0.75) were higher than that obtained by the  
5 BDI-II (0.54).  
6  
7  
8  
9

10  
11 Furthermore, the ROC analysis revealed acceptable validity for both scales with the EPDS  
12 (AUC = 0.95) showing a higher accuracy than the BDI-II (AUC = 0.91). Thus, the EPDS  
13 might be the most convenient screening tool for AD in Qatar. This result is consistent with  
14 that of a systematic review on AD screening instruments in low resource settings, which  
15 revealed an apparent superiority for EPDS (AUC = 0.96) with a pooled sensitivity of 0.80  
16 and pooled specificity of 0.81.<sup>9</sup> Similarly, a meta-analysis on the reliability and validity of  
17 perinatal depression screening instruments in African countries concluded that EPDS was the  
18 most reliable and valid tool.<sup>25</sup> On the other hand, the current results oppose those reported  
19 from a similar validation study in Brazil, in which the BDI-II was found to be the best-  
20 performing screening instrument (AUC=0.9) and showed a higher accuracy than the EPDS  
21 (AUC=0.85).<sup>12</sup>  
22  
23  
24  
25  
26  
27  
28  
29  
30  
31  
32  
33  
34  
35

36  
37 A key question was which cut-off point will reveal the maximum dichotomy between  
38 depressed and non-depressed patients and result in further intervention. The current study  
39 revealed that the best cut-off value for the EPDS was  $\geq 13$ , which is consistent with that  
40 obtained from studies in Saudi Arabia, Oman, and New Zealand.<sup>3,4,16</sup> Additionally, a score  
41 above 13 was identified as the optimal EPDS cut-off point by a recent study in Japan. The  
42 study yielded an area under the curve of 0.956 as well as a sensitivity and specificity of 90%  
43 and 92.1% respectively.<sup>17</sup> On the other hand, an EPDS cut-off value  $\geq 9$  was the most optimal  
44 in African countries. The aforementioned value was associated with a pooled sensitivity and  
45 specificity of 0.94 and 0.77 respectively.<sup>25</sup> Regarding the BDI-II tool, the results showed that  
46 a cut-off value  $\geq 19$  distinguishes the most between depressed and non-depressed expecting  
47 mothers. In contrast, the previously mentioned validation study in Brazil determined an  
48  
49  
50  
51  
52  
53  
54  
55  
56  
57  
58  
59  
60

1  
2  
3 optimal cut-off value  $\geq 16$ .<sup>12</sup> Also, a much lower BDI score (11/12) was identified as the  
4  
5 optimal cut-off point among pregnant women in Taiwan, at which the sensitivity and the  
6  
7 specificity were 74% and 83% respectively.<sup>26</sup> Such variation of results across different  
8  
9 settings highlights the importance of validation studies to identify the most appropriate  
10  
11 screening tool and cut-off value in each population.  
12  
13

14  
15 In order to minimize the selection bias, the sample taken in this study included pregnant  
16  
17 women during all trimesters of pregnancy. This has been supported by the recommendation  
18  
19 of the USPSTF which underlines the importance of screening pregnant women for AD  
20  
21 regardless of their gestational age.<sup>7</sup> In addition to that, a study conducted in Saudi Arabia  
22  
23 found an insignificant difference in the prevalence of AD across different trimesters.<sup>3</sup>  
24  
25 However, a study conducted in Korea concluded that the highest prevalence of AD occurred  
26  
27 during the third trimester (61.4%).<sup>14</sup> On the other hand, another study from Nigeria  
28  
29 determined that the first trimester entailed the higher burden of AD with a prevalence of  
30  
31 27.5%.<sup>15</sup>  
32  
33  
34  
35

36  
37 This was the first study in the State of Qatar to identify the most suitable screening tool for  
38  
39 AD. The sample in the current study was derived from a heterogeneous population of  
40  
41 pregnant women, regardless the gestational age, attending nine primary health centers across  
42  
43 the country. Furthermore, the investigators were blinded to the results to avoid any  
44  
45 interviewer bias. Also, the examined screening tools in the study were compared with the  
46  
47 golden standard tool (MINI). Such factors might allow for the universal administration of  
48  
49 EPDS as a screening tool in the primary health care setting. Similarly, the construct validity  
50  
51 is the top strategy in validating a tool and it was demonstrated in this study.  
52  
53

54  
55 One of the limitations in this study was the inability to use the Structured Clinical Interview  
56  
57 for DSM-5 (SCID-5) as a tool for diagnosing antenatal depression.<sup>27</sup> The reason behind this  
58  
59  
60

1  
2  
3 was the need for lengthy appointments, which was not feasible because such action will  
4 interrupt the general workflow in the antenatal care clinic of the primary health care center.  
5  
6  
7

8  
9 In conclusion, the current study shows that EPDS and BDI-II can be employed as AD  
10 screening tools in antenatal clinics at the primary health care level. The EPDS was found to  
11 have superior psychometric properties in comparison to the BDI-II tool. Ultimately, the  
12 proper use of the aforementioned screening tools along with their cut-off values will help in  
13 the early identification of AD among pregnant women in Qatar, regardless of their trimester.  
14  
15 As a result, such step will help raise awareness about antenatal depression and alleviate some  
16 of its burden in the country.  
17  
18  
19  
20  
21  
22  
23  
24

### 25 **Acknowledgments**

26  
27  
28 None.  
29

### 30 **Competing Interests**

31  
32  
33 The authors declare no conflict of interest.  
34  
35  
36  
37

### 38 **Funding**

39  
40  
41 None.  
42  
43  
44

### 45 **Ethical**

46  
47 This study was approved by the Institutional Review Board of the Primary Health Care  
48 Corporation under protocol ID (PHCC/RC/18/04/002).  
49  
50  
51

### 52 **Author contributorship**

53  
54  
55 SN contributed to the conception and planning of the research. All authors contributed  
56 equally to the conduct and reporting of the work described in the article.  
57  
58  
59  
60

1  
2  
3  
4  
5  
6  
7  
8  
9  
10  
11  
12  
13  
14  
15  
16  
17  
18  
19  
20  
21  
22  
23  
24  
25  
26  
27  
28  
29  
30  
31  
32  
33  
34  
35  
36  
37  
38  
39  
40  
41  
42  
43  
44  
45  
46  
47  
48  
49  
50  
51  
52  
53  
54  
55  
56  
57  
58  
59  
60

**Data sharing**

All data relevant to the study are included in the article.

For peer review only

## References

1. Cohen N. Public health perspectives on depressive disorders. Baltimore: John Hopkins University, 2017:281.
2. World Health Organization (WHO). WHO Maternal mental health. WHO; 2017. Available from: [http://www.who.int/mental\\_health/maternal-child/maternal\\_mental\\_health/en/](http://www.who.int/mental_health/maternal-child/maternal_mental_health/en/)[accessed 17 April 2018]
3. Alotaibe H, Elsaid T, Almomen R. The prevalence and risk factors for antenatal depression among pregnant women attending clinics in Riyadh, Saudi Arabia. *EJPMR* 2016;3:60-67 .
4. Al-Azri M, Al-Lawati I, Al-Kamyani R, et al. Prevalence and Risk Factors of Antenatal Depression among Omani Women in a Primary Care Setting: Cross-sectional study. *Sultan Qaboos Univ Med J* 2016;16:e35-41.
5. World health Organization (WHO). Thinking healthy a manual for psychosocial management for perinatal depression. WHO; 2015. Available from: [http://apps.who.int/iris/bitstream/10665/152936/1/WHO\\_MSD\\_MER\\_15.1\\_eng.pdf?ua=1&ua=1](http://apps.who.int/iris/bitstream/10665/152936/1/WHO_MSD_MER_15.1_eng.pdf?ua=1&ua=1)[accessed 17 April 2018]
6. World Health Organization (WHO). WHO Interventions for common perinatal mental disorders in women in low- and middle-income countries: a systematic review and meta-analysis .WHO; 2013. Available from: <http://www.who.int/bulletin/volumes/91/8/12-109819/en/> [accessed 31 December 2018].
7. O'Connor E, Rossom R, Henninger M, et al. Primary Care Screening for and Treatment of Depression in Pregnant and Postpartum Women. *JAMA* 2016;315:388.
8. Siu A, Bibbins-Domingo K, Grossman D, et al. Screening for Depression in Adults. *JAMA* 2016;315:380.



- 1  
2  
3 9. Chorwe-Sungani G, Chipps J. A systematic review of screening instruments for  
4  
5 depression for use in antenatal services in low resource settings. *BMC Psychiatry*  
6  
7 2017;17.  
8  
9
- 10 10. Yonkers K, Smith M, Gotman N, et al. Typical somatic symptoms of pregnancy and  
11  
12 their impact on a diagnosis of major depressive disorder. *Gen Hosp Psychiatry*  
13  
14 2009;31:327-333.  
15  
16
- 17 11. Nylén K, Williamson J, O'Hara M, et al. Validity of somatic symptoms as indicators of  
18  
19 depression in pregnancy. *Arch Womens Ment Health* 2013;16:203-210.  
20  
21
- 22 12. Castro e Couto T, Martins Brancaglioni M, Nogueira Cardoso M, et al. What is the best  
23  
24 tool for screening antenatal depression?. *J Affect Disord* 2015;178:12-17.  
25  
26
- 27 13. Lholcombjr W, Sstone L, Jlustman P, et al. Screening for depression in pregnancy:  
28  
29 Characteristics of the Beck Depression Inventory. *Obstet Gynecol* 1996;88:1021-1025.  
30  
31
- 32 14. Park J, Karmaus W, Zhang H. Prevalence of and Risk Factors for Depressive Symptoms  
33  
34 in Korean Women throughout Pregnancy and in Postpartum Period. *Asian Nurs Res*  
35  
36 2015;9:219-225.  
37  
38
- 39 15. Thompson O, Ajayi I. Prevalence of Antenatal Depression and Associated Risk Factors  
40  
41 among Pregnant Women Attending Antenatal Clinics in Abeokuta North Local  
42  
43 Government Area, Nigeria. *Depress Res Treat* 2016;2016:1-15.  
44  
45
- 46 16. Waldie K, Peterson E, D'Souza S, et al. Depression symptoms during pregnancy:  
47  
48 Evidence from Growing Up in New Zealand. *J Affect Disord* 2015;186:66-73.  
49  
50
- 51 17. Usuda K, Nishi D, Okazaki E, et al. Optimal cut-off score of the Edinburgh Postnatal  
52  
53 Depression Scale for major depressive episode during pregnancy in Japan. *Psychiatry*  
54  
55 *Clin Neurosci* 2017;71:836-842.  
56  
57
- 58 18. Singh R, Agarwal T, Al-Thani H, et al. Validation of a Survey Questionnaire on Organ  
59  
60 Donation: An Arabic World Scenario. *J Transplant* 2018;2018:1-10.

- 1  
2  
3 19. Mathers N, Fox N, Hunn A. Surveys and Questionnaires. The NIHR RDS for the East  
4 Midlands / Yorkshire & the Humber. The NIHR Research Design Service for Yorkshire  
5 & the Humber 2007.  
6  
7  
8  
9  
10 20. Cox JL, Holden JM, Segovsky R. Detection of postnatal depression: Development of  
11 the 10-item Edinburgh Postnatal Depression Scale. *Br J Psychiatry* 1987;150:782-786.  
12  
13 21. Hendrick V. Psychiatric Disorders in Pregnancy and the Postpartum. Dordrecht:  
14 Springer 2008:14.  
15  
16  
17 22. Sheehan D, Lecrubier Y, Harnett Sheehan K, et al. The validity of the Mini International  
18 Neuropsychiatric Interview (MINI) according to the SCID-P and its reliability. *Eur*  
19 *Psychiatry* 1997;12:232-241.  
20  
21  
22 23. Onah M, Field S, Bantjes J, et al. Perinatal suicidal ideation and behaviour: psychiatry  
23 and adversity. *Arch Women's Ment Health* 2016;20:321-331.  
24  
25  
26 24. Pettersson A, Modin S, Wahlström R, et al. The Mini-International Neuropsychiatric  
27 Interview is useful and well accepted as part of the clinical assessment for depression  
28 and anxiety in primary care: a mixed-methods study. *BMC Fam Pract* 2018;19.  
29  
30  
31 25. Tsai A, Scott J, Hung K, et al. Reliability and Validity of Instruments for Assessing  
32 Perinatal Depression in African Settings: Systematic Review and Meta-Analysis. *PLoS*  
33 *ONE* 2013;8:e82521.  
34  
35  
36 26. Su K, Chiu T, Huang C, et al. Different cutoff points for different trimesters? The use of  
37 Edinburgh Postnatal Depression Scale and Beck Depression Inventory to screen for  
38 depression in pregnant Taiwanese women. *Gen Hosp Psychiatry* 2007;29:436-441.  
39  
40  
41 27. American Psychiatry Association (APA). Structured Clinical Interview for DSM-5  
42 (SCID-5) .Appi.org. 2017 Available from: [https://www.appi.org/products/structured-](https://www.appi.org/products/structured-clinical-interview-for-dsm-5-scid-5)  
43 [clinical-interview-for-dsm-5-scid-5](https://www.appi.org/products/structured-clinical-interview-for-dsm-5-scid-5)[accessed 25 December 2018].  
44  
45  
46  
47  
48  
49  
50  
51  
52  
53  
54  
55  
56  
57  
58  
59  
60

## Figure legends

1  
2  
3 Figure (1): Receiving operating characteristic (ROC) curves of the EPDS and BDI-II scales  
4  
5

6  
7 Figure (2): Correlation graph of the EPDS and BDI-II scales  
8  
9

10 Figure (3): Scree plots of the EPDS and BDI-II scales  
11  
12  
13  
14  
15  
16  
17  
18  
19  
20  
21  
22  
23  
24  
25  
26  
27  
28  
29  
30  
31  
32  
33  
34  
35  
36  
37  
38  
39  
40  
41  
42  
43  
44  
45  
46  
47  
48  
49  
50  
51  
52  
53  
54  
55  
56  
57  
58  
59  
60

For peer review only

**Figure (1):** Receiving operating characteristic (ROC) curves of the EPDS and BDI-II scales

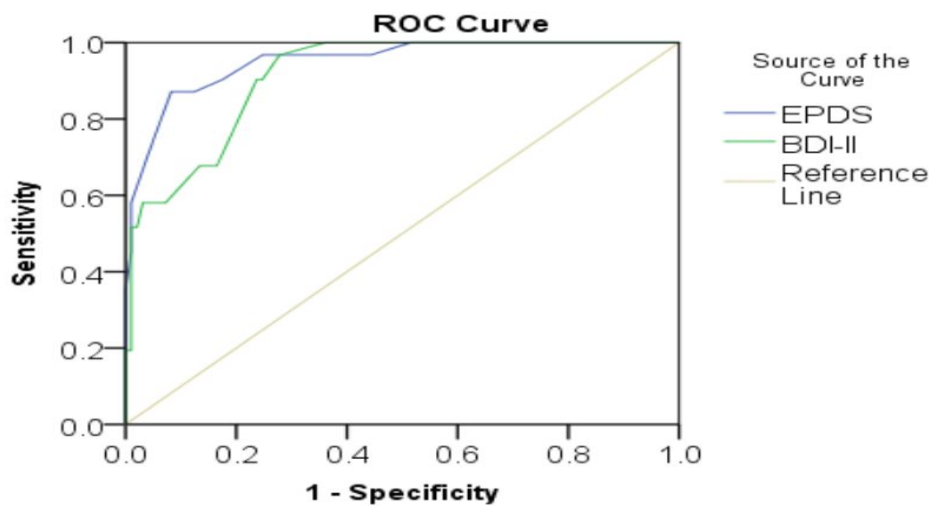

Diagonal segments are produced by ties.

Peer review only

**Figure (2):** Correlation graph of the EPDS and BDI-II scales

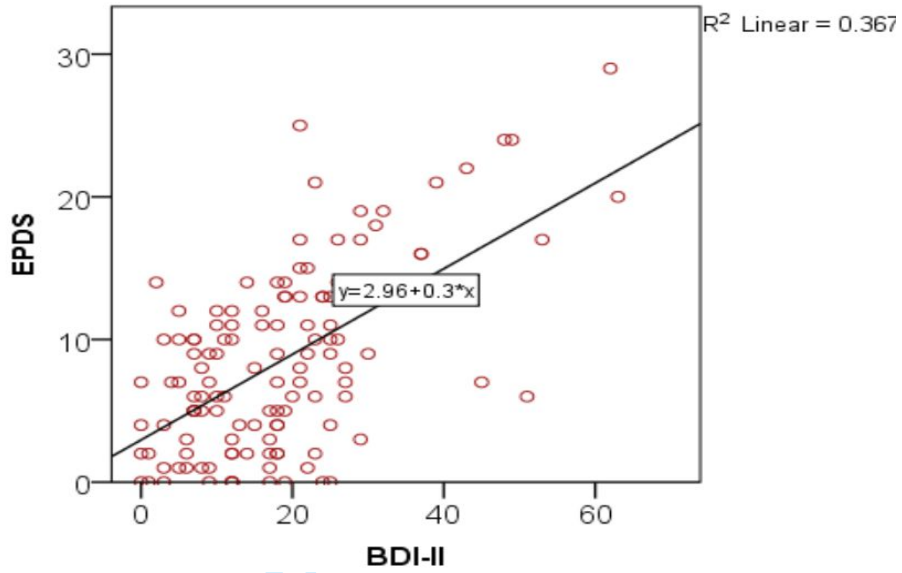

Peer review only

**Figure (3):** Scree plots of the EPDS and BDI-II scales

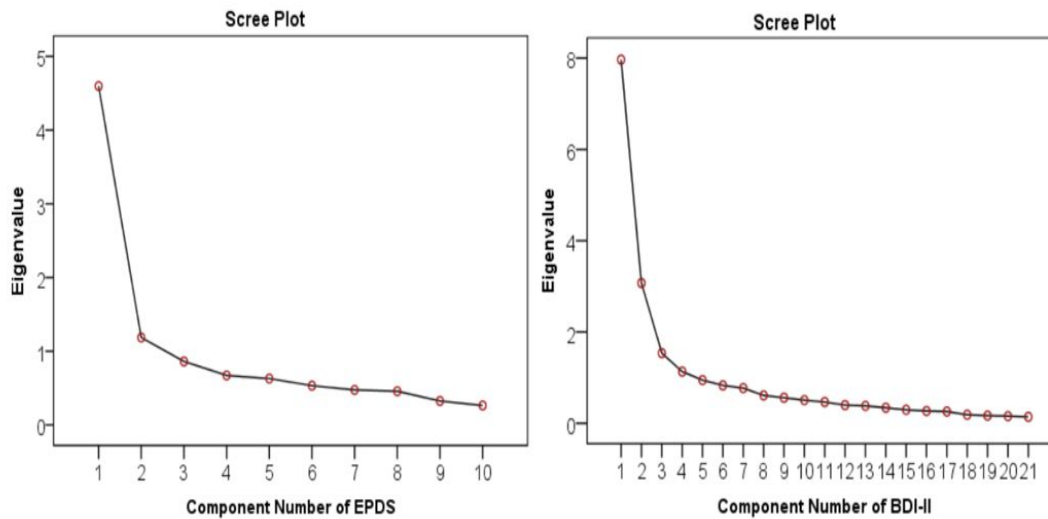

Peer review only

# BMJ Open

## Psychometric properties of the Arabic version of EPDS and BDI-II as a screening tool for antenatal depression: Evidence from Qatar

|                                 |                                                                                                                                                                                                                                                                                                   |
|---------------------------------|---------------------------------------------------------------------------------------------------------------------------------------------------------------------------------------------------------------------------------------------------------------------------------------------------|
| Journal:                        | <i>BMJ Open</i>                                                                                                                                                                                                                                                                                   |
| Manuscript ID                   | bmjopen-2019-030365.R1                                                                                                                                                                                                                                                                            |
| Article Type:                   | Research                                                                                                                                                                                                                                                                                          |
| Date Submitted by the Author:   | 13-Jun-2019                                                                                                                                                                                                                                                                                       |
| Complete List of Authors:       | Naja, Sarah; Hamad Medical Corp, Community Medicine Al-Kubaisi, Noura; Primary Health Care Corp Chehab, Mohamad; Hamad Medical Corp, Community Medicine Al-Dahshan, Ayman; Hamad Medical Corp, Community Medicine Abuhashem, Nada ; Hamad Medical Corp Bougmiza , Iheb ; Primary Health Care Corp |
| <b>Primary Subject Heading</b>: | Mental health                                                                                                                                                                                                                                                                                     |
| Secondary Subject Heading:      | Evidence based practice, General practice / Family practice, Mental health, Obstetrics and gynaecology, Qualitative research                                                                                                                                                                      |
| Keywords:                       | MENTAL HEALTH, antenatal depression, validation studies, Edinburgh Postnatal Depression Scale, Beck Depression Inventory-II, Mini International Neuropsychiatric Interview                                                                                                                        |
|                                 |                                                                                                                                                                                                                                                                                                   |

SCHOLARONE™  
Manuscripts

1  
2  
3  
4 **Psychometric properties of the Arabic version of EPDS and BDI-II as a screening**  
5 **tool for antenatal depression: Evidence from Qatar**  
6  
7

8 Sarah Naja <sup>(1)\*</sup>, Noora Al Kubaisi <sup>(2)</sup>, Mohamad Chehab <sup>(1)</sup>, Ayman Al Dahshan <sup>(1)</sup>, Nada  
9  
10  
11 Abubashem <sup>(1)</sup>, Iheb Bougmiza <sup>(2)</sup>  
12

13 (1): Hamad Medical Corporation, Doha, Qatar; [dr.sj.naja@gmail.com](mailto:dr.sj.naja@gmail.com);

14  
15 [Mchehab2@hamad.qa](mailto:Mchehab2@hamad.qa), [aadahshan@hamad.qa](mailto:aadahshan@hamad.qa); [nadaadli@outlook.com](mailto:nadaadli@outlook.com)  
16  
17

18 (2): Primary Health Care Corporation, Doha, Qatar; [nalkubaisi@phcc.gov.qa](mailto:nalkubaisi@phcc.gov.qa);

19  
20 [mbougmiza@phcc.gov.qa](mailto:mbougmiza@phcc.gov.qa)  
21

22 **\*Correspondence:** Dr. Sarah Naja, Community Medicine Residency Program,  
23

24 Department of Medical Education, Hamad Medical Corporation, Doha, Qatar. P.O. Box  
25

26  
27 3050; [dr.sj.naja@gmail.com](mailto:dr.sj.naja@gmail.com)  
28

29 Main study was funded by HMC  
30

31 Word count: **3470**  
32  
33  
34  
35  
36  
37  
38  
39  
40  
41  
42  
43  
44  
45  
46  
47  
48  
49  
50  
51  
52  
53  
54  
55  
56  
57  
58  
59  
60

review only



## Abstract

**Objectives:** The current study aimed to validate and determine the psychometric properties of the Arabic versions of the Beck Depression Inventory-II (BDI-II) and the Edinburgh Postnatal Depression Scale (EPDS) in Qatar.

**Design:** A cross-sectional study design was employed.

**Setting:** Antenatal care (ANC) clinics at nine primary health care centers.

**Participants:** Pregnant women (n=128), aged 15-46 years in different trimesters of pregnancy, attending the ANC clinics as well as capable of reading as well as writing in the Arabic language.

**Results:** A total of 128 participants were enrolled. Upon conducting the receiver operating characteristic (ROC) analysis, the EPDS showed a larger area under the curve at 0.951 than the BDI-II tool (0.9). Using Youden's index, a score  $\geq 13$  on the EPDS (87% sensitivity, 90% specificity) and  $\geq 19$  on the BDI-II (96% sensitivity, 73% specificity) allowed for the greatest division between depressed and non-depressed participants.

**Conclusion:** To address the under-recognition of antenatal depression, physicians at primary health care centers in Qatar should be encouraged to utilize the EPDS to screen pregnant women seeking antenatal care services.

### Strengths and limitations of this study

- This was the first study in the State of Qatar to identify the most valid screening tool for antenatal depression. Furthermore, the study identified the optimal cut-off points for the Arabic versions of the EPDS and BDI-II among the pregnant population in the country.
- The sample in the current study was derived from a heterogeneous population of pregnant women across the Qatar.
- The examined screening tools in the study were compared with the golden standard (MINI) tool.

- 1  
2  
3 • One of the limitations of this study was the inability to use the Structured Clinical Interview  
4 for DSM-5 (SCID-5) as a tool for diagnosing antenatal depression.  
5  
6

7  
8 **Keywords:** mental health; antenatal depression; validation studies; Edinburgh Postnatal  
9  
10 Depression Scale; Beck Depression Inventory-II; Mini International Neuropsychiatric  
11  
12 Interview  
13

14  
15 **Conflict of Interest:** None declared  
16  
17  
18  
19  
20  
21  
22  
23  
24  
25  
26  
27  
28  
29  
30  
31  
32  
33  
34  
35  
36  
37  
38  
39  
40  
41  
42  
43  
44  
45  
46  
47  
48  
49  
50  
51  
52  
53  
54  
55  
56  
57  
58  
59  
60

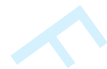

## INTRODUCTION

Globally, maternal mental health problems are considered as a major public health challenge, where depression affects 10% of pregnant women in developed countries and 15.6% in the developing nations (WHO,2017).<sup>1,2</sup> Also, the variation in the prevalence of pregnancy-related depression from one country to another may be justified by the use of different measurement tools and methodologies among the different populations.

High figures were revealed in Arab Gulf countries, where antenatal depression was estimated to impact more than half (57.5%) of expecting mothers in Saudi Arabia and almost a quarter (24%) in Oman during 2016.<sup>3, 4</sup> However, pregnant women with mental disorders can be managed through effective and low-cost interventions after being properly screened by their health care providers.<sup>5, 6</sup>

The United States Preventive Services Task Force (USPSTF) encourages the identification of antenatal depression through screening all gravid women at the primary health care level, given the fact that antenatal depression is a serious, prevalent, and treatable disease (B recommendation).<sup>7</sup> Nevertheless, there is a lack of strong evidence regarding the best screening tool to be employed.<sup>8</sup>

In 2017, a published systematic review compared seven screening tools including the Edinburgh Postnatal Depression Scale (EPDS), Beck Depression Index (BDI-II), Centre for Epidemiologic Studies Depression Scale (CES-D), Hamilton Rating Scale for Depression (HRSD), Hopkins Symptoms Checklist (HSCL), Kessler Psychological Distress Scale (K10), and Self-Reporting Questionnaire (SRQ). The review concluded that the EPDS was the most suitable antenatal depression screening tool in low-resource settings due to its superior level of accuracy and sensitivity.<sup>9</sup>

Debatably, some researchers prefer EPDS as it excludes constitutional symptoms (e.g. changes in sleeping pattern and food habits) in the screening of antenatal depression as such symptoms

1  
2  
3 are considered uninformative and common in normal pregnancy .<sup>10</sup> On the other hand, some  
4  
5 scholars choose BDI-II , arguing that somatic symptoms are valid indicators and these  
6  
7 constitutional symptoms should not necessarily be dismissed as normative pregnancy  
8  
9 experiences.<sup>11</sup> Given the ease of administrating self-report measures in the clinical and research  
10  
11 settings, the decision to include or exclude the aforementioned symptoms is crucial for  
12  
13 decision-makers as it will affect their choice of the screening tool.  
14  
15

16  
17 The identification of an optimal cut-off point could be a key consideration when screening  
18  
19 pregnant women especially that literature reveals different cut-off points used among different  
20  
21 populations to distinguish between depressed and non-depressed pregnant women. For BDI-II  
22  
23 diverse cut-off points were used including a cut-off  $\geq 15$  in Brazil <sup>12</sup>, while higher cut-off point  
24  
25  $\geq 16$  was used in Washington. <sup>13</sup> Similarly, For EPDS, a cut-off value of  $\geq 10$  was employed in  
26  
27 Korea <sup>14</sup> and Spain, <sup>15</sup> while  $\geq 11$  was utilized in Nigeria <sup>16</sup>, and  $>13$  in New Zealand as well as  
28  
29 Japan.<sup>17,18</sup>. This indicates that there is no international agreement on a specific cut-off value for  
30  
31 antenatal depression screening. Furthermore, the adequate determination of this threshold in  
32  
33 the screening process is necessary to decrease the false positive and false negative rates and  
34  
35 their relevant implications.  
36  
37  
38

39  
40 Qatar is a country located on the west coast of the Arabian Gulf and a member of the Gulf  
41  
42 Cooperation Council (GCC). During the past decade, the country has been home the world's  
43  
44 fastest growing population and second-highest migrant population. <sup>19</sup> The Arab population  
45  
46 currently constitutes about 27% of the total population (45% are Qatari and 55% are non-  
47  
48 Qatari). <sup>20</sup> Based on Qatar's new National Health Strategy (2018-22), there is a focus on  
49  
50 preventative strategies among specific vulnerable cohorts such as pregnant women.<sup>21</sup> Thus, the  
51  
52 country's main provider of primary health services, the Primary Health Care Corporation, has  
53  
54 aligned its corporate strategy with the National Health Strategy and is aiming at better  
55  
56 population health through early detection and screening programs by 2023. <sup>(22)</sup>  
57  
58  
59  
60

1  
2  
3 Unfortunately, there is a lack of evidence regarding the most valid screening tool to detect  
4 depression among pregnant women in the country. Thus, the objective of this study is to  
5 validate and determine the psychometric properties of the Beck Depression Inventory-II (BDI-  
6 II) and the Edinburgh Postnatal Depression Scale (EPDS) in Qatar.  
7  
8  
9  
10  
11

## 12 **Material and Methods**

13  
14 This study is part of a larger project that aimed to measure the prevalence of antenatal  
15 depression in Qatar at the Primary Health Care Corporation. The results of the pilot study in  
16 relation to the validation of the Arabic version of EPDS and BDI-21 are reported in this paper.  
17  
18  
19  
20  
21

### 22 **Study setting**

23  
24 This was a cross-sectional study conducted among Arab pregnant women attending the  
25 antenatal clinics of the Primary Health Care Corporation (PHCC) in Qatar. The data was  
26 collected during both morning and evening work shifts of the health centers and the data  
27 collection took place in August and September of 2018.  
28  
29  
30  
31  
32

33  
34 The primary health centers are the first line of contact between pregnant women and the  
35 healthcare system in the country with antenatal participation rate is high as (60%) of the total  
36 live births. PHCC provides accessible preventive, promotive, and curative services to the  
37 community in Qatar. At the time of the study, there were 23 antenatal clinics across the country  
38 and each clinic was operated by a Family Medicine Practitioner.<sup>23</sup>  
39  
40  
41  
42  
43  
44  
45

### 46 **Sampling Methods or strategy**

47  
48 A cluster random sampling technique was employed. First, the list of the primary health centers  
49 that provide antenatal services was obtained from the "Operations Department" at PHCC. The  
50 list also included the total number and percentage of pregnant women attending the ANC clinic  
51 in each health center and in total (23 centers during the study period). Secondly, the *Automated*  
52 *Random Number Generator* technique was used to select randomly nine health centers out of  
53 twenty-three. Thus, each selected health center was designated as a cluster. Finally, the nine  
54  
55  
56  
57  
58  
59  
60

1  
2  
3 selected health centers were visited by data collectors to enrol eligible participants on a daily  
4  
5 basis until fulfilling the quota (n=128).  
6  
7

### 8 **Patient and public involvement**

9  
10 We did not involve patients or the public in our work.  
11  
12

### 13 **Sample size and participants**

14  
15  
16 In order to validate the aforementioned screening tools and identify their psychometric  
17  
18 properties, the sample size was calculated at 100 to adequately estimate the sensitivity and  
19  
20 specificity of the tools; given a margin of error of at most 5% and a 95% confidence interval.<sup>24</sup>  
21  
22

23 To be included in the study, the participants had to be pregnant women (aged 15 -49 years),  
24  
25 capable of reading and writing in the Arabic language, and granting a written consent. No  
26  
27 restrictions were made regarding the specific trimester of pregnancy.  
28  
29

### 30 **Research protocol**

31  
32  
33 The eligible pregnant women were first informed about the study and its objectives. After  
34  
35 signing the consent form, the participants were briefly interviewed about their demographic  
36  
37 and pregnancy-related characteristics. Afterwards, they were asked to complete the self-  
38  
39 administrated Arabic versions of the EPDS and BDI-II tools before their scheduled antenatal  
40  
41 care visit. Subsequently, the participants would directly undergo the Mini-International  
42  
43 Neuropsychiatric Interview (MINI) with the primary care physician during their ANC visit to  
44  
45 avoid any unwanted exposure or interference. Also, the aforementioned physicians were  
46  
47 blinded to the results of the EPDS and BDI-II tools. Thus, the enrolled pregnant women were  
48  
49 assessed for antenatal depression through the three tools during the same visit. As a result, any  
50  
51 participant who was diagnosed positive for antenatal depression through the MINI tool was  
52  
53 referred to specialised secondary care (psychiatrists) for further evaluation and management.  
54  
55  
56  
57  
58  
59

### 60 **Data collection tools**

- An interview-based and structured questionnaire on sociodemographic and pregnancy-related characteristics (age, nationality, gravidity, trimester, family income, number of children, educational level, occupational status and family size).
- The Edinburgh Postnatal Depression Scale (EPDS) is a self-administrated tool and was first published in the British Journal of Psychiatry during 1987. It consists of 10 items and has been validated for use in different populations.<sup>25</sup>
- The Beck Depression Inventory (BDI-II), first introduced in 1961, is a brief 10-minutes self-administered questionnaire that can detect the presence of depressive symptoms. It consists of 21 questions pertaining to the various aspects of mood such as sadness, suicidal ideation, loss of weight, and social withdrawal.<sup>26</sup>
- The Mini-International Neuropsychiatric Interview (MINI) is a short, diagnostic, and structured interview that is used for diagnosing major Axis I psychiatric disorders in DSM-V and ICD-10.<sup>27</sup> The MINI tool was employed and validated through several studies, particularly for diagnosing depression disorders.<sup>28,29</sup>

### **Translation**

First, the standard English versions of the EPDS and BDI-II tools were retrieved. Then, they were translated to Arabic by a bilingual clinician whose primary language is Arabic and is familiar with the terminology of the area covered by the instrument (Forward translation). Next, a panel consisting of one clinician, a researcher in the field, and the aforementioned translator checked the expressions and concepts of the Arabic version for any discrepancy in comparison to the original English one. Any significant difference was corrected in consensus and the final Arabic versions were translated back to English by an independent bilingual clinician whose mother tongue was English. After the back-translation ensured the accuracy of the translated versions, they were piloted on a sample of 20 pregnant women. The pilot testing aimed to check

1  
2  
3 if the Arabic versions were clear and understandable among study subjects as well as  
4  
5 interviewers, where the piloted sample was excluded from analyses.  
6  
7

### 8 **Statistical analysis**

- 9  
10 • The socio-demographic and clinical characteristics were summarized using descriptive  
11  
12 statistics in the form of means and standard deviations for quantitative variables as well as  
13  
14 frequency and percentages for categorical variables. Additionally, bivariate analyses were  
15  
16 conducted through the chi-square or Fisher's exact tests to compare the association between  
17  
18 the dependent (antenatal depression) and independent variable (socio-demographic and  
19  
20 clinical characteristics).  
21  
22
- 23  
24 • The receiver operating characteristic (ROC) analysis was employed to measure the accuracy  
25  
26 of the EPDS and BDI-II in diagnosing major depression according to DSM-V criteria.  
27  
28 Afterwards, Youden's index ( $J = \text{Sensitivity} + \text{Specificity} - 1$ ) was used to determinate the best  
29  
30 cut-off points for antenatal depression screening. Also, Cronbach's alpha ( $\alpha$ ) was employed  
31  
32 as an estimate of scale reliability, internal consistency, and item homogeneity.  
33  
34
- 35  
36 • To examine the concordance among the psychometric scales tested, the Pearson correlation  
37  
38 coefficient ( $r$ ) was calculated. In addition, a Principal Component Analysis (PCA) was  
39  
40 carried out on the EPDS and BDI-II tools to identify subsets the components of the tools  
41  
42 contributing to the most of the variance. The convergent construct validity of the EPDS was  
43  
44 demonstrated through a rotated component matrix (varimax rotation). The Kaiser-Meyer-  
45  
46 Olkin (KMO) values were considered for measuring sampling adequacy.  
47  
48
- 49  
50 • The analysis was conducted using the Statistical Package for the Social Sciences (SPSS  
51  
52 v.23) based on a preset significant level of 0.05.  
53

## 54 **RESULTS**

### 55 **3.1 Demographic characteristics**

56  
57  
58  
59  
60



One hundred and twenty-eight (128) pregnant women matched the inclusion criteria and accepted to participate in the current study. Table 1 presents the background characteristics of the study participants, where most of the pregnant women were non-Qatari Arabs (82%), holding a diploma or university degree (70%), unemployed (55%), with a monthly family income >10,000 QR (75%), multigravid (71%), and in the second trimester of their pregnancy (48%). Additionally, the mean age of the participants was 28.8 (SD=5 years).

**Table 1:** Socio demographic and clinical characteristics of the study sample (n=128)

|                                   | MINI-diagnostic |                | Total (n) | $\chi^2$ | p value       |
|-----------------------------------|-----------------|----------------|-----------|----------|---------------|
|                                   | Positive n (%)  | Negative n (%) |           |          |               |
| <b>Age (years)</b>                |                 |                |           |          |               |
| 20-34                             | 31(26)          | 87(74)         | 118       | 0.87     | <b>0.46</b>   |
| 35-46                             | 4 (40)          | 6(60)          | 10        |          |               |
| <b>Nationality</b>                |                 |                |           | 0.053    | <b>0.817</b>  |
| Qatari                            | 6(23.1)         | 17(73.9)       | 23        |          |               |
| Other Arabs                       | 25(23.8)        | 80(79.2)       | 105       |          |               |
| <b>Trimester</b>                  |                 |                |           | 1.56     | <b>0.457</b>  |
| 1 <sup>st</sup> trimester         | 8(29.6)         | 19(70.4)       | 27        |          |               |
| 2 <sup>nd</sup> trimester         | 12(19.4)        | 50(80.6)       | 62        |          |               |
| 3 <sup>rd</sup> trimester         | 11(28.2)        | 28(71.8)       | 39        |          |               |
| <b>Gravida</b>                    |                 |                |           | 0.224    | <b>0.636</b>  |
| Primigravida                      | 10(73)          | 27(27.8)       | 37        |          |               |
| Multigravida                      | 21(23.1)        | 70(76.9)       | 91        |          |               |
| <b>Family Monthly income (QR)</b> |                 |                |           | 4.5      | <b>0.1</b>    |
| < 10.000 QR                       | 7(22.6)         | 24(77.4)       | 31        |          |               |
| 10.000 - < 20.000 QR              | 20(37)          | 34(63)         | 54        |          |               |
| ≥ 20.000 QR                       | 8(18.6)         | 35(81.4)       | 43        |          |               |
| <b>Number of children</b>         |                 |                |           | 1.48     | <b>0.685</b>  |
| zero                              | 10(26.3)        | 28(73.7)       | 38        |          |               |
| [1-3]                             | 19(22.9)        | 64(77.1)       | 83        |          |               |
| [4-5]                             | 2(40)           | 3(60)          | 5         |          |               |
| ≥ 6                               | 0(0)            | 2(100)         | 2         |          |               |
| <b>Educational level*</b>         |                 |                |           | 9.1      | <b>0.027*</b> |
| Higher education                  | 18(20)          | 72(80)         | 90        |          |               |
| Secondary education               | 7(25.9)         | 20(74.1)       | 27        |          |               |
| Primary education                 | 6(54.5)         | 5(45.5)        | 11        |          |               |

|                            |          |          |    |       |               |
|----------------------------|----------|----------|----|-------|---------------|
| <b>Occupational Status</b> |          |          |    |       |               |
| Housewife                  | 20(28.2) | 51(71.8) | 71 | 1.828 | <b>0.4</b>    |
| Employed                   | 8(17.4)  | 38(82.6) | 46 |       |               |
| Student                    | 3(27.3)  | 8(27.7)  | 11 |       |               |
| <b>Family size*</b>        |          |          |    |       |               |
| Small family size(<5)      | 11(14.7) | 64(85.3) | 75 | 11.63 | <b>0.003*</b> |
| Average family size(=5)    | 10(50)   | 10(50)   | 20 |       |               |
| Large family size(>5)      | 10(30.3) | 23(69.7) | 33 |       |               |

\*  $p \leq 0.05$ /a=Fisher test/ Chi-square SD: Standard Deviation - QR: Qatari Riyals

## 3.2. Psychometric properties of the scales

### 3.2.1. Reliability

The internal consistency of the EPDS and BDI-II scales was calculated at  $\alpha = 0.865$  and  $0.90$  respectively. Using Lawshe's method, an expert panel of three clinicians evaluated the questionnaire for the necessity of items, their grammar, wording, and scaling. The necessity of each item was assessed using a 3-point rating scale: (a) not necessary, (b) useful but not essential, and (c) essential. The universal agreement between the three raters was 78% for the EPDS (intra-class correlation coefficient  $0.78$  [CI  $0.16-0.94$ ]) and 59% for the BDI-II (intra-class correlation coefficient  $0.59$ [CI  $0.033-0.9$ ]).

### 3.2.2. Cut-offs

Based on Youden's index, the following cut-off scores were determined: A score  $\geq 13$  on the EPDS (87% sensitivity, 90% specificity) and  $\geq 19$  on the BDI-II (96% sensitivity, 73% specificity) (Table 2).

**Table 2:** The psychometric properties of the EPDS and BDI-II Scales

|      | Cut-off   | Sensitivity | Specificity | Corrected classified | LR+  | LR-    | Youden's Index |
|------|-----------|-------------|-------------|----------------------|------|--------|----------------|
| EPDS | $\geq 8$  | 96%         | 64%         | 46.2%                | 2.66 | 0.062  | 60%            |
|      | $\geq 9$  | 96%         | 68%         | 49.2%                | 3    | 0.0058 | 64%            |
|      | $\geq 10$ | 96%         | 76%         | 55.6%                | 4    | 0.0052 | 72%            |
|      | $\geq 11$ | 90%         | 83%         | 62.2%                | 5.29 | 0.12   | 73%            |
|      | $\geq 12$ | 87%         | 88%         | 69.2%                | 7.25 | 0.15   | 75%            |

|        |     |     |     |       |      |       |     |
|--------|-----|-----|-----|-------|------|-------|-----|
|        | ≥13 | 87% | 90% | 77.1% | 8.7  | 0.14  | 77% |
|        | ≥14 | 71% | 99% | 84.6% | 17.3 | 0.29  | 71% |
| BDI-II | ≥18 | 96% | 63% | 46%   | 2.59 | 0.063 | 59% |
|        | ≥19 | 96% | 73% | 51.7% | 3.5  | 0.05  | 69% |
|        | ≥20 | 90% | 76% | 53.8% | 3.75 | 0.13  | 66% |
|        | ≥21 | 90% | 77% | 54%   | 3.9  | 0.12  | 67% |
|        | ≥22 | 80% | 80% | 55.6% | 4    | 0.25  | 60% |
|        | ≥23 | 74% | 82% | 56.1% | 4.1  | 0.31  | 56% |
|        | ≥24 | 67% | 84% | 56.8% | 4.18 | 0.39  | 51% |

Note: EPDS: Edinburgh Postnatal Depression Scale; BDI-II: Beck Depression Inventory; LR: Likelihood ratio

### 3.2.3 Validity

Using ROC analysis, the area under the curve (AUC) was calculated at 0.951 (SE=0.02; 95%CI= 0.91-0.99) for EPDS and 0.912 (SE=0.025; 95%CI=0.86–0.96) for BDI (Figure 1).

### 3.2.4 Correlation

The correlation established between EPDS and BDI-II was 60% which represent a weak uphill linear correlation (Figure 2).

### 3.2 .5 Construct validity

Principle component analyses (PCA) was conducted for the EPDS and BDI-II scales (Figure 3). The analysis suggested that two components of the EPDS explain most of the variance with a cumulative percentage of 58%. The two components were item 2 (sadness) and item 8 (optimism). The convergent construct validity of EPDS was demonstrated through a rotated component matrix of 0.75, which is acceptable and significant (p=0.01). Discriminant validity was supported because no violations were seen in the correlation matrix. Also, the scree plot of the BDI-II suggests that four components explain most of the variance with a cumulative percentage of 65.2%. These four factors were item 7 (self-dislike), item 2 (pessimistic), item 3 (past failure), and item 6 (punishment feeling). The convergent construct validity of the BDI-II was weak as seen through a rotated component matrix of 0.45. No violations were noted in

1  
2  
3 the correlation matrix, hence supporting discriminant validity. The Kaiser-Meyer-Olkin  
4 (KMO) values were considered for measuring sampling adequacy for each factor analysis and  
5  
6 it showed to be 0.872 ( $p < 0.001$ ).  
7  
8  
9

10 **Figure (1):** Receiving operating characteristic (ROC) curves of the EPDS and BDI-II scales

11 **Figure (2):** Correlation between EPDS and BDI-II

12 **Figure (3):** Scree plots of EPDS and BDI-II

## 13 14 15 16 **DISCUSSION**

17  
18 In the current study, a similar prevalence rate of antenatal depression was found through the  
19 EPDS and MINI-interview tools at 27.3% and 24% respectively. However, the BDI -II detected  
20 a higher prevalence at 45.3%. Overall, the EPDS was found to be superior to the BDI-II because  
21 the positive predictive value of the former (0.75) was much higher than that of the latter (0.54).  
22 Given that the positive predictive value could be influenced by the actual prevalence of the  
23 disease, the likelihood ratio was calculated and revealed that the EPDS had a higher positive  
24 likelihood ratio, nearly triple that of the BDI-II. Additionally, the EPDS showed a higher  
25 Youden's Index. So, the EPDS demonstrated a better performance and was the more useful  
26 screening tool for antenatal depression in Qatar.  
27  
28  
29  
30  
31  
32  
33  
34  
35  
36  
37  
38

39 The previously mentioned result is consistent with that of a systematic review on AD  
40 screening instruments across low resource settings, which revealed an apparent superiority for  
41 EPDS (AUC = 0.96) with a pooled sensitivity and specificity of 0.80 and 0.81 respectively.<sup>9</sup>  
42 Similarly, a meta-analysis on the reliability and validity of perinatal depression screening  
43 instruments for perinatal depression in African countries concluded that the EPDS was the most  
44 reliable and valid tool.<sup>30</sup> On the other hand, the current results oppose those reported from a  
45 similar validation study in Brazil, where the BDI-II was found to be the best-performing  
46 screening instrument (AUC=0.9) and showed higher accuracy than the EPDS (AUC=0.85).<sup>12</sup>  
47 In addition to that, a key question was which cut-off point will reveal the maximum dichotomy  
48 between the depressed and non-depressed patients and result in further intervention. The  
49  
50  
51  
52  
53  
54  
55  
56  
57  
58  
59  
60

1  
2  
3 current study revealed that the best cut-off value for the EPDS was  $\geq 13$ , which is consistent  
4 with that obtained from studies in Saudi Arabia, Oman, and New Zealand.<sup>3,4,17</sup> Additionally, a  
5 score above 13 was identified as the optimal EPDS cut-off point by a recent study in Japan. On  
6 the other hand, the study yielded an area under the curve of 0.956 as well as a sensitivity and  
7 specificity of 90% and 92.1% respectively.<sup>18</sup> whereas, an EPDS cut-off value  $\geq 9$  was the most  
8 optimal in African countries. The aforementioned value was associated with a pooled  
9 sensitivity and specificity of 0.94 and 0.77 respectively.<sup>30</sup> Another study in Spain showed that  
10 EPDS cut-off value  $\geq 10$  (AUC of 0.76, sensitivity of 72.4%, specificity of 79.3%, PPV of  
11 18.2%, NPV of 97.8%, and OA of 78.9%).<sup>15</sup>

12  
13  
14  
15  
16  
17  
18  
19  
20  
21  
22  
23  
24 Regarding the BDI-II tool, the results showed that a cut-off value  $\geq 19$  distinguishes the most  
25 between depressed and non-depressed expecting mothers. In contrast, the previously  
26 mentioned validation study in Brazil determined that the optimal cut-off value was  $\geq 16$ .<sup>12</sup>  
27 Also, a much lower BDI score (11/12) was identified as the optimal cut-off point among  
28 pregnant women in Taiwan, at which the sensitivity and the specificity were 74% and 83%  
29 respectively.<sup>31</sup> Such variation of results across different settings highlights the importance of  
30 validation studies to identify the most appropriate screening tool and associated cut-off value  
31 in each population.

32  
33  
34  
35  
36  
37  
38  
39  
40  
41  
42  
43 In order to minimize the selection bias, the sample taken in this study included pregnant women  
44 during all trimesters of pregnancy in the first (21%), second (48%), and third (30%) trimester  
45 of pregnancy. This has been supported by the recommendation of the USPSTF which  
46 underlines the importance of screening pregnant women for antenatal depression regardless of  
47 their gestational age.<sup>7</sup> In addition to that, a study conducted in Saudi Arabia found an  
48 insignificant difference in the prevalence of antenatal depression across different trimesters.<sup>3</sup>  
49 However, a study conducted in Korea concluded that the highest prevalence of antenatal  
50 depression occurred during the third trimester (61.4%).<sup>15</sup> On the other hand, another study from  
51  
52  
53  
54  
55  
56  
57  
58  
59  
60

1  
2  
3 Nigeria determined that the first trimester entailed the higher burden of antenatal depression  
4 with a prevalence of 27.5%.<sup>16</sup>  
5  
6

7  
8 This was the first study in the State of Qatar to identify the most suitable screening tool for  
9 antenatal depression. The study sample in the current study was derived from a heterogeneous  
10 population of pregnant women, regardless the gestational age, attending nine primary health  
11 centers across the country. Furthermore, the investigators were blinded to the results to avoid  
12 any interviewer bias. Also, the examined screening tools in the study were compared with the  
13 golden standard tool (MINI). Similarly, the construct validity of the EPDS has been  
14 demonstrated in the current study. The aforementioned factors allow for the universal  
15 administration of the EPDS as a screening tool in Qatar's primary health care setting. One of  
16 the limitations in this study was the inability to use the Structured Clinical Interview for DSM-5  
17 (SCID-5) as a tool for diagnosing antenatal depression.<sup>32</sup> The reason behind this was the need  
18 for lengthy appointments, which was not feasible because such action will interrupt the general  
19 workflow at the antenatal care clinic of the primary health care center.  
20  
21  
22  
23  
24  
25  
26  
27  
28  
29  
30  
31  
32  
33  
34  
35

36 In conclusion, the current study shows that the EPDS is superior to BDI-II as an antenatal  
37 depression screening tool at the primary health care level in Qatar. The EPDS was found to  
38 have better psychometric properties in comparison to the BDI-II tool. Ultimately, the proper  
39 use of the aforementioned screening tools along with their cut-off values will help in the early  
40 identification of AD among pregnant women in Qatar. As a result, such step will help raise  
41 awareness about antenatal depression and alleviate some of its burden in the country.  
42  
43  
44  
45  
46  
47  
48  
49

## 50 **Acknowledgments**

51  
52 None.  
53  
54  
55

## 56 **Competing Interests**

1  
2  
3 The authors declare no conflict of interest.  
4  
5

### 6 **Funding**

7

8  
9 None.  
10  
11

### 12 **Ethical**

13

14  
15 This study was approved by the Institutional Review Board of the Primary Health Care  
16 Corporation under protocol ID (PHCC/RC/18/06/002).  
17  
18

### 19 **Author contributor ship**

20  
21

22  
23 SN designed the study, performed the statistical analysis, interpretation of the results and  
24 drafted the manuscript. NAK and IB helped in designing the study. MC and AA helped in data  
25 analysis and participated in the preparation of the manuscript. NA helped in data collection,  
26 entry, and interpretation. All authors revised and approved the final version of the manuscript.  
27  
28 Each author contributed important intellectual content during manuscript drafting or revision  
29 and accepts accountability for the overall work by ensuring that questions pertaining to the  
30 accuracy or integrity of any portion of the work are appropriately investigated and resolved.  
31  
32  
33  
34  
35  
36  
37  
38  
39

### 40 **Data sharing**

41

42 All data relevant to the study are included in the article.  
43  
44  
45  
46  
47  
48  
49  
50  
51  
52  
53  
54  
55  
56  
57  
58  
59  
60

## References

1. Cohen N. Public health perspectives on depressive disorders. Baltimore: John Hopkins University, 2017:281.
2. World Health Organization (WHO). WHO Maternal mental health. WHO; 2017. Available from: [http://www.who.int/mental\\_health/maternal-child/maternal\\_mental\\_health/en/](http://www.who.int/mental_health/maternal-child/maternal_mental_health/en/)[accessed 17 April 2018]
3. Alotaibe H, Elsaid T, Almomen R. The prevalence and risk factors for antenatal depression among pregnant women attending clinics in Riyadh, Saudi Arabia. *EJPMR* 2016;3:60-67 .
4. Al-Azri M, Al-Lawati I, Al-Kamyani R, et al. Prevalence and Risk Factors of Antenatal Depression among Omani Women in a Primary Care Setting: Cross-sectional study. *Sultan Qaboos Univ Med J* 2016;16:e35-41.
5. World health Organization (WHO). Thinking healthy a manual for psychosocial management for perinatal depression. WHO; 2015. Available from: [http://apps.who.int/iris/bitstream/10665/152936/1/WHO\\_MSD\\_MER\\_15.1\\_eng.pdf?ua=1&ua=1](http://apps.who.int/iris/bitstream/10665/152936/1/WHO_MSD_MER_15.1_eng.pdf?ua=1&ua=1)[accessed 17 April 2018]
6. World Health Organization (WHO). WHO Interventions for common perinatal mental disorders in women in low- and middle-income countries: a systematic review and meta-analysis .WHO; 2013. Available from: <http://www.who.int/bulletin/volumes/91/8/12-109819/en/> [accessed 31 December 2018].
7. O'Connor E, Rossom R, Henninger M, et al. Primary Care Screening for and Treatment of Depression in Pregnant and Postpartum Women. *JAMA* 2016;315:388.
8. Siu A, Bibbins-Domingo K, Grossman D, et al. Screening for Depression in Adults. *JAMA* 2016;315:380.
9. Chorwe-Sungani G, Chipps J. A systematic review of screening instruments for depression for use in antenatal services in low resource settings. *BMC Psychiatry* 2017;17.
10. Yonkers K, Smith M, Gotman N, et al. Typical somatic symptoms of pregnancy and their impact on a diagnosis of major depressive disorder. *Gen Hosp Psychiatry* 2009;31:327-333.
11. Nylen K, Williamson J, O'Hara M, et al. Validity of somatic symptoms as indicators of depression in pregnancy. *Arch Womens Ment Health* 2013;16:203-210.
12. Castro e Couto T, Martins Brancaglion M, Nogueira Cardoso M, et al. What is the best tool for screening antenatal depression?. *J Affect Disord* 2015;178:12-17.
13. Lholcombjr W, Sstone L, Jlustman P, et al. Screening for depression in pregnancy: Characteristics of the Beck Depression Inventory. *Obstet Gynecol* 1996;88:1021-1025.
14. Park J, Karmaus W, Zhang H. Prevalence of and Risk Factors for Depressive Symptoms in Korean Women throughout Pregnancy and in Postpartum Period. *Asian Nurs Res* 2015;9:219-225.
15. Vázquez M, Míguez M. Validation of the Edinburgh postnatal depression scale as a screening tool for depression in Spanish pregnant women. *Journal of Affective Disorders*. 2019; 246:515-521.
16. Thompson O, Ajayi I. Prevalence of Antenatal Depression and Associated Risk Factors among Pregnant Women Attending Antenatal Clinics in Abeokuta North Local Government Area, Nigeria. *Depress Res Treat* 2016;1-15.
17. Waldie K, Peterson E, D'Souza S, et al. Depression symptoms during pregnancy: Evidence from Growing Up in New Zealand. *J Affect Disord* 2015;186:66-73.



18. Usuda K, Nishi D, Okazaki E, et al. Optimal cut-off score of the Edinburgh Postnatal Depression Scale for major depressive episode during pregnancy in Japan. *Psychiatry Clin Neurosci* 2017;71:836-842.
19. Ministry of public health (MOPH). Qatar health report 2013. Qatar: MOPH;2013.
20. Qatar Statistics Authority (QSA). Planning and Statistics Authority (PSA). .Qatar statistics authority Census; 2010.; Available:www.qsa.gov.qa. [cited2018May 29]
21. Ministry of Public Health (MOPH). Qatar National Health Strategy 2018-2022. MOPH; P10-14.
22. Primary Health Care Corporation (PHCC). Corporate Strategic Plan 2019-2023.PHCC;2019.
23. Primary Health Care Corporation (PHCC). Antenatal Care Report. Doha: Primary Health Care Corporation. PHCC; 2012.
24. Mathers N, Fox N, Hunn A. Surveys and Questionnaires. The NIHR RDS for the East Midlands / Yorkshire & the Humber. The NIHR Research Design Service for Yorkshire & the Humber 2007.
25. Cox JL, Holden JM, Segovsky R. Detection of postnatal depression: Development of the 10-item Edinburgh Postnatal Depression Scale. *Br J Psychiatry* 1987;150:782-786.
26. Hendrick V. Psychiatric Disorders in Pregnancy and the Postpartum. Dordrecht: Springer 2008:14.
27. Sheehan D, Lecrubier Y, Harnett Sheehan K, et al. The validity of the Mini International Neuropsychiatric Interview (MINI) according to the SCID-P and its reliability. *Eur Psychiatry* 1997;12:232-241.
28. Onah M, Field S, Bantjes J, et al. Perinatal suicidal ideation and behaviour: psychiatry and adversity. *Arch Women's Ment Health* 2016;20:321-331.
29. Pettersson A, Modin S, Wahlström R, et al. The Mini-International Neuropsychiatric Interview is useful and well accepted as part of the clinical assessment for depression and anxiety in primary care: a mixed-methods study. *BMC Fam Pract* 2018;19.
30. Tsai A, Scott J, Hung K, et al. Reliability and Validity of Instruments for Assessing Perinatal Depression in African Settings: Systematic Review and Meta-Analysis. *PLoS ONE* 2013;8:e82521.
31. Su K, Chiu T, Huang C, et al. Different cutoff points for different trimesters? The use of Edinburgh Postnatal Depression Scale and Beck Depression Inventory to screen for depression in pregnant Taiwanese women. *Gen Hosp Psychiatry* 2007;29:436-441.
32. American Psychiatry Association (APA).Structured Clinical Interview for DSM-5 (SCID-5) .Appi.org. 2017 Available from: <https://www.appi.org/products/structured-clinical-interview-for-dsm-5-scid-5>[accessed 25 December 2018].

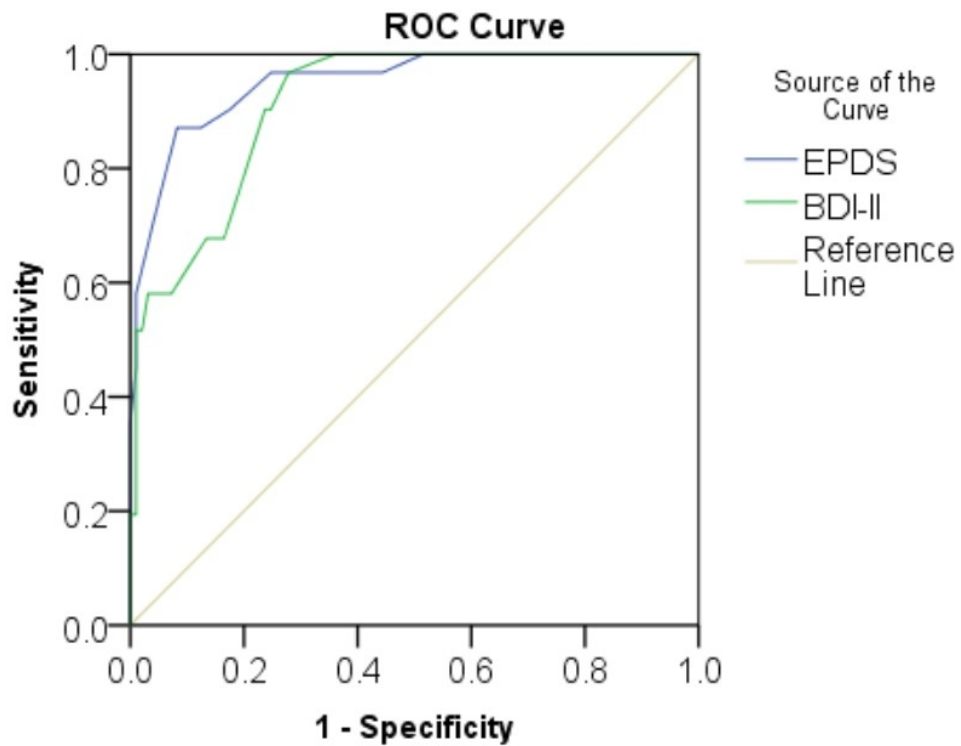

Diagonal segments are produced by ties.

Figure (1): Receiving operating characteristic (ROC) curves of the EPDS and BDI-II scales

124x101mm (168 x 168 DPI)

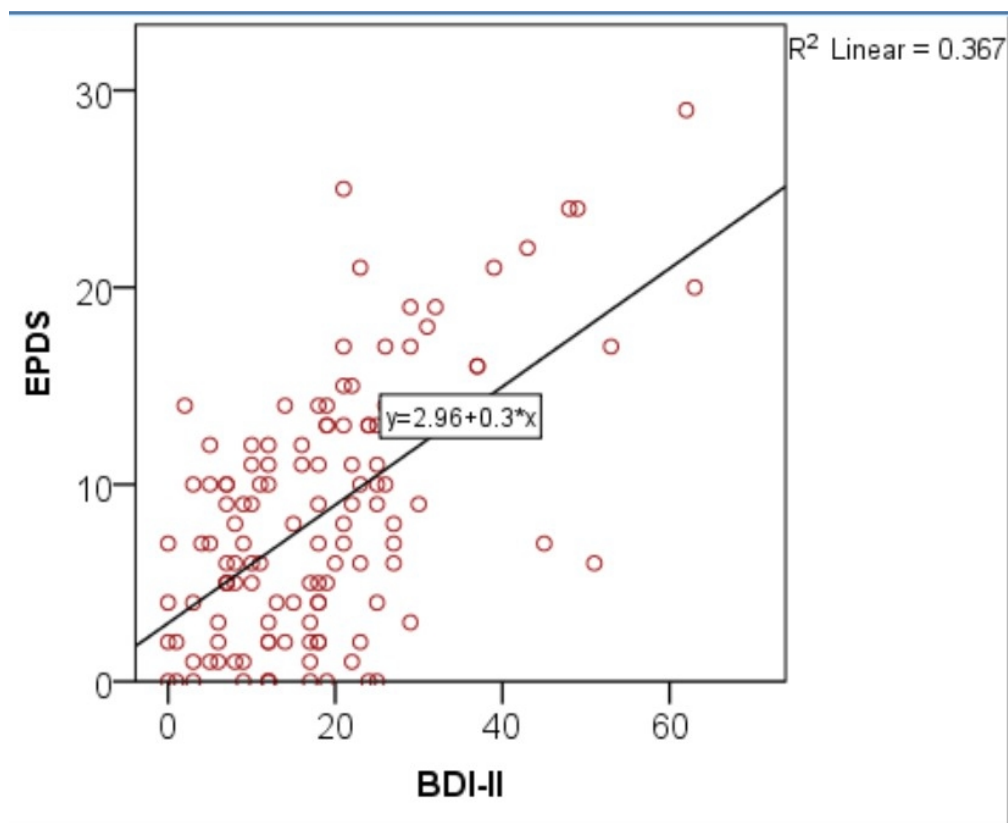

Figure (2): Correlation graph of the EPDS and BDI-II scales

123x101mm (168 x 168 DPI)

1  
2  
3  
4  
5  
6  
7  
8  
9  
10  
11  
12  
13  
14  
15  
16  
17  
18  
19  
20  
21  
22  
23  
24  
25  
26  
27  
28  
29  
30  
31  
32  
33  
34  
35  
36  
37  
38  
39  
40  
41  
42  
43  
44  
45  
46  
47  
48  
49  
50  
51  
52  
53  
54  
55  
56  
57  
58  
59  
60

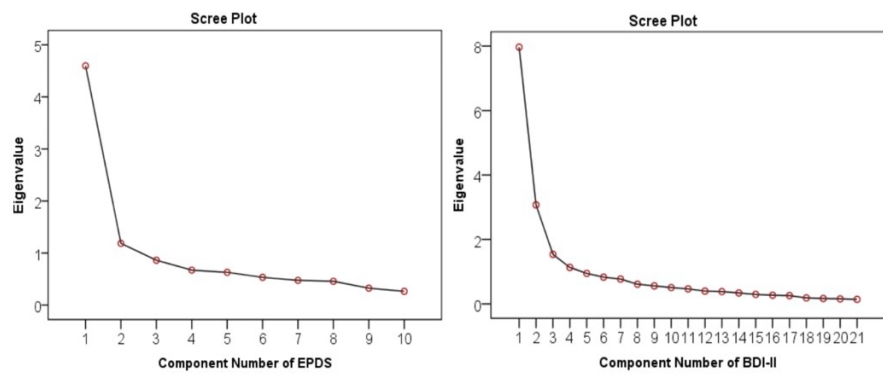

Figure (3): Scree plots of the EPDS and BDI-II scales  
177x81mm (168 x 168 DPI)

# BMJ Open

## Psychometric properties of the Arabic version of EPDS and BDI-II as a screening tool for antenatal depression: Evidence from Qatar

|                                 |                                                                                                                                                                                                                                                                                                   |
|---------------------------------|---------------------------------------------------------------------------------------------------------------------------------------------------------------------------------------------------------------------------------------------------------------------------------------------------|
| Journal:                        | <i>BMJ Open</i>                                                                                                                                                                                                                                                                                   |
| Manuscript ID                   | bmjopen-2019-030365.R2                                                                                                                                                                                                                                                                            |
| Article Type:                   | Research                                                                                                                                                                                                                                                                                          |
| Date Submitted by the Author:   | 15-Jul-2019                                                                                                                                                                                                                                                                                       |
| Complete List of Authors:       | Naja, Sarah; Hamad Medical Corp, Community Medicine Al-Kubaisi, Noora; Primary Health Care Corp Chehab, Mohamad; Hamad Medical Corp, Community Medicine Al-Dahshan, Ayman; Hamad Medical Corp, Community Medicine Abuhashem, Nada ; Hamad Medical Corp Bougmiza , Iheb ; Primary Health Care Corp |
| <b>Primary Subject Heading</b>: | Mental health                                                                                                                                                                                                                                                                                     |
| Secondary Subject Heading:      | Evidence based practice, General practice / Family practice, Mental health, Obstetrics and gynaecology, Qualitative research                                                                                                                                                                      |
| Keywords:                       | MENTAL HEALTH, antenatal depression, validation studies, Edinburgh Postnatal Depression Scale, Beck Depression Inventory-II, Mini International Neuropsychiatric Interview                                                                                                                        |
|                                 |                                                                                                                                                                                                                                                                                                   |

SCHOLARONE™  
Manuscripts

1  
2  
3  
4 **Psychometric properties of the Arabic version of EPDS and BDI-II as a screening**  
5 **tool for antenatal depression: Evidence from Qatar**  
6  
7

8 Sarah Naja <sup>(1)\*</sup>, Noora Al Kubaisi <sup>(2)</sup>, Mohamad Chehab <sup>(1)</sup>, Ayman Al Dahshan <sup>(1)</sup>, Nada  
9  
10  
11 Abubashem <sup>(1)</sup>, Iheb Bougmiza <sup>(2)</sup>  
12

13 (1): Hamad Medical Corporation, Doha, Qatar; [dr.sj.naja@gmail.com](mailto:dr.sj.naja@gmail.com);

14  
15 [Mchehab2@hamad.qa](mailto:Mchehab2@hamad.qa), [aadahshan@hamad.qa](mailto:aadahshan@hamad.qa); [nadaadli@outlook.com](mailto:nadaadli@outlook.com)  
16  
17

18 (2): Primary Health Care Corporation, Doha, Qatar; [njalkubaisi@phcc.gov.qa](mailto:njalkubaisi@phcc.gov.qa);

19  
20 [mbougmiza@phcc.gov.qa](mailto:mbougmiza@phcc.gov.qa)  
21

22 **\*Correspondence:** Dr. Sarah Naja, Community Medicine Residency Program,

23  
24 Department of Medical Education, Hamad Medical Corporation, Doha, Qatar. P.O. Box

25  
26  
27 3050; [dr.sj.naja@gmail.com](mailto:dr.sj.naja@gmail.com)  
28

29 Main study was funded by HMC

30  
31 Word count: **3470**  
32  
33  
34  
35  
36  
37  
38  
39  
40  
41  
42  
43  
44  
45  
46  
47  
48  
49  
50  
51  
52  
53  
54  
55  
56  
57  
58  
59  
60

review only

## Abstract

**Objectives:** The current study aimed to validate and determine the psychometric properties of the Arabic versions of the Beck Depression Inventory-II (BDI-II) and the Edinburgh Postnatal Depression Scale (EPDS) in Qatar.

**Design:** A cross-sectional study design was employed.

**Setting:** Antenatal care (ANC) clinics at nine primary health care centers.

**Participants:** Pregnant women (n=128), aged 15-46 years in different trimesters of pregnancy, attending the ANC clinics as well as capable of reading as well as writing in the Arabic language.

**Results:** A total of 128 participants were enrolled. Upon conducting the receiver operating characteristic (ROC) analysis, the EPDS showed a larger area under the curve at 0.951 than the BDI-II tool (0.9). Using Youden's index, a score  $\geq 13$  on the EPDS (87% sensitivity, 90% specificity) and  $\geq 19$  on the BDI-II (96% sensitivity, 73% specificity) allowed for the greatest division between depressed and non-depressed participants.

**Conclusion:** To address the under-recognition of antenatal depression, physicians at primary health care centers in Qatar should be encouraged to utilize the EPDS to screen pregnant women seeking antenatal care services.

### Strengths and limitations of this study

- This was the first study in the State of Qatar to identify the most valid screening tool for antenatal depression. Furthermore, the study identified the optimal cut-off points for the Arabic versions of the EPDS and BDI-II among the pregnant population in the country.
- The sample in the current study was derived from a heterogeneous population of pregnant women across the Qatar.
- The examined screening tools in the study were compared with the golden standard (MINI) tool.

- 1  
2  
3 • One of the limitations of this study was the inability to use the Structured Clinical Interview  
4 for DSM-5 (SCID-5) as a tool for diagnosing antenatal depression.  
5  
6

7  
8 **Keywords:** mental health; antenatal depression; validation studies; Edinburgh Postnatal  
9  
10 Depression Scale; Beck Depression Inventory-II; Mini International Neuropsychiatric  
11  
12 Interview  
13

14  
15 **Conflict of Interest:** None declared  
16  
17  
18  
19  
20  
21  
22  
23  
24  
25  
26  
27  
28  
29  
30  
31  
32  
33  
34  
35  
36  
37  
38  
39  
40  
41  
42  
43  
44  
45  
46  
47  
48  
49  
50  
51  
52  
53  
54  
55  
56  
57  
58  
59  
60





## INTRODUCTION

Globally, maternal mental health problems are considered as a major public health challenge, where depression affects 10% of pregnant women in developed countries and 15.6% in the developing nations (WHO,2017).<sup>1,2</sup> Also, the variation in the prevalence of pregnancy-related depression from one country to another may be justified by the use of different measurement tools and methodologies among the different populations.

High figures were revealed in Arab Gulf countries, where antenatal depression was estimated to impact more than half (57.5%) of expecting mothers in Saudi Arabia and almost a quarter (24%) in Oman during 2016.<sup>3, 4</sup> However, pregnant women with mental disorders can be managed through effective and low-cost interventions after being properly screened by their health care providers.<sup>5, 6</sup>

The United States Preventive Services Task Force (USPSTF) encourages the identification of antenatal depression through screening all gravid women at the primary health care level, given the fact that antenatal depression is a serious, prevalent, and treatable disease (B recommendation).<sup>7</sup> Nevertheless, there is a lack of strong evidence regarding the best screening tool to be employed.<sup>8</sup>

In 2017, a published systematic review compared seven screening tools including the Edinburgh Postnatal Depression Scale (EPDS), Beck Depression Index (BDI-II), Centre for Epidemiologic Studies Depression Scale (CES-D), Hamilton Rating Scale for Depression (HRSD), Hopkins Symptoms Checklist (HSCL), Kessler Psychological Distress Scale (K10), and Self-Reporting Questionnaire (SRQ). The review concluded that the EPDS was the most suitable antenatal depression screening tool in low-resource settings due to its superior level of accuracy and sensitivity.<sup>9</sup>

Debatably, some researchers prefer EPDS as it excludes constitutional symptoms (e.g. changes in sleeping pattern and food habits) in the screening of antenatal depression as such

1  
2  
3 symptoms are considered uninformative and common in normal pregnancy .<sup>10</sup> On the other  
4  
5 hand, some scholars choose BDI-II , arguing that somatic symptoms are valid indicators and  
6  
7 these constitutional symptoms should not necessarily be dismissed as normative pregnancy  
8  
9 experiences.<sup>11</sup> Given the ease of administrating self-report measures in the clinical and  
10  
11 research settings, the decision to include or exclude the aforementioned symptoms is crucial  
12  
13 for decision-makers as it will affect their choice of the screening tool.  
14  
15

16  
17 The identification of an optimal cut-off point could be a key consideration when screening  
18  
19 pregnant women especially that literature reveals different cut-off points used among  
20  
21 different populations to distinguish between depressed and non-depressed pregnant women.  
22  
23 For BDI-II diverse cut-off points were used including a cut-off  $\geq 15$  in Brazil <sup>12</sup>, while higher  
24  
25 cut-off point  $\geq 16$  was used in Washington. <sup>13</sup> Similarly, For EPDS, a cut-off value of  $\geq 10$   
26  
27 was employed in Korea <sup>14</sup> and Spain, <sup>15</sup> while  $\geq 11$  was utilized in Nigeria <sup>16</sup>, and  $>13$  in New  
28  
29 Zealand as well as Japan.<sup>17,18</sup> This indicates that there is no international agreement on a  
30  
31 specific cut-off value for antenatal depression screening. Furthermore, the adequate  
32  
33 determination of this threshold in the screening process is necessary to decrease the false  
34  
35 positive and false negative rates and their relevant implications.  
36  
37  
38

39  
40 Qatar is a country located on the west coast of the Arabian Gulf and a member of the Gulf  
41  
42 Cooperation Council (GCC). During the past decade, the country has been home the world's  
43  
44 fastest growing population and second-highest migrant population. <sup>19</sup> The Arab population  
45  
46 currently constitutes about 27% of the total population (45% are Qatari and 55% are non-  
47  
48 Qatari). <sup>20</sup> Based on Qatar's new National Health Strategy (2018-22), there is a focus on  
49  
50 preventative strategies among specific vulnerable cohorts such as pregnant women. <sup>21</sup> Thus,  
51  
52 the country's main provider of primary health services, the Primary Health Care Corporation,  
53  
54 has aligned its corporate strategy with the National Health Strategy and is aiming at better  
55  
56 population health through early detection and screening programs by 2023. <sup>(22)</sup>  
57  
58  
59  
60

1  
2  
3 Unfortunately, there is a lack of evidence regarding the most valid screening tool to detect  
4 depression among pregnant women in the country. Thus, the objective of this study is to  
5 validate and determine the psychometric properties of the Beck Depression Inventory-II  
6 (BDI-II) and the Edinburgh Postnatal Depression Scale (EPDS) in Qatar.  
7  
8  
9

## 10 11 12 **Material and Methods**

13  
14 This study is part of a larger project that aimed to measure the prevalence of antenatal  
15 depression in Qatar at the Primary Health Care Corporation. The results of the pilot study in  
16 relation to the validation of the Arabic version of EPDS and BDI-21 are reported in this  
17 paper.  
18  
19  
20  
21  
22

### 23 24 **Study setting**

25  
26 This was a cross-sectional study conducted among Arab pregnant women attending the  
27 antenatal clinics of the Primary Health Care Corporation (PHCC) in Qatar. The data was  
28 collected during both morning and evening work shifts of the health centers and the data  
29 collection took place in August and September of 2018.  
30  
31  
32  
33  
34

35  
36 The primary health centers are the first line of contact between pregnant women and the  
37 healthcare system in the country with antenatal participation rate is high as (60%) of the total  
38 live births. PHCC provides accessible preventive, promotive, and curative services to the  
39 community in Qatar. At the time of the study, there were 23 antenatal clinics across the  
40 country and each clinic was operated by a Family Medicine Practitioner.<sup>23</sup>  
41  
42  
43  
44  
45  
46  
47

### 48 49 **Sampling Methods or strategy**

50  
51 A cluster random sampling technique was employed. First, the list of the primary health  
52 centers that provide antenatal services was obtained from the "Operations Department" at  
53 PHCC. The list also included the total number and percentage of pregnant women attending  
54 the ANC clinic in each health center and in total (23 centers during the study period).  
55  
56  
57  
58  
59  
60 Secondly, the *Automated Random Number Generator* technique was used to select randomly

1  
2  
3 nine health centers out of twenty-three. Thus, each selected health center was designated as a  
4 cluster. Finally, the nine selected health centers were visited by data collectors to enrol  
5 eligible participants on a daily basis until fulfilling the quota (n=128).  
6  
7  
8  
9

### 10 **Patient and public involvement**

11 We did not involve patients or the public in our work.  
12  
13  
14

### 15 **Sample size and participants**

16 In order to validate the aforementioned screening tools and identify their psychometric  
17 properties, the sample size was calculated at 100 to adequately estimate the sensitivity and  
18 specificity of the tools; given a margin of error of at most 5% and a 95% confidence  
19 interval.<sup>24</sup> To be included in the study, the participants had to be pregnant women (aged 15 -  
20 49 years), capable of reading and writing in the Arabic language, and granting a written  
21 consent. No restrictions were made regarding the specific trimester of pregnancy.  
22  
23  
24  
25  
26  
27  
28  
29  
30  
31  
32

### 33 **Research protocol**

34 The eligible pregnant women were first informed about the study and its objectives. After  
35 signing the consent form, the participants were briefly interviewed about their demographic  
36 and pregnancy-related characteristics. Afterwards, they were asked to complete the self-  
37 administrated Arabic versions of the EPDS and BDI-II tools before their scheduled antenatal  
38 care visit. Subsequently, the participants would directly undergo the Mini-International  
39 Neuropsychiatric Interview (MINI) with the primary care physician during their ANC visit to  
40 avoid any unwanted exposure or interference. Also, the aforementioned physicians were  
41 blinded to the results of the EPDS and BDI-II tools. Thus, the enrolled pregnant women were  
42 assessed for antenatal depression through the three tools during the same visit. As a result,  
43 any participant who was diagnosed positive for antenatal depression through the MINI tool  
44  
45  
46  
47  
48  
49  
50  
51  
52  
53  
54  
55  
56  
57  
58  
59  
60

1  
2  
3 was referred to specialised secondary care (psychiatrists) for further evaluation and  
4  
5 management.  
6  
7

### 8 9 **Data collection tools**

- 10  
11  
12
- 13 • An interview-based and structured questionnaire on sociodemographic and pregnancy-  
14 related characteristics (age, nationality, gravidity, trimester, family income, number of  
15 children, educational level, occupational status and family size).  
16  
17
  - 18 • The Edinburgh Postnatal Depression Scale (EPDS) is a self-administrated tool and was  
19 first published in the British Journal of Psychiatry during 1987. It consists of 10 items and  
20 has been validated for use in different populations.<sup>25</sup>  
21  
22
  - 23 • The Beck Depression Inventory (BDI-II), first introduced in 1961, is a brief 10-minutes  
24 self-administered questionnaire that can detect the presence of depressive symptoms. It  
25 consists of 21 questions pertaining to the various aspects of mood such as sadness,  
26 suicidal ideation, loss of weight, and social withdrawal.<sup>26</sup>  
27  
28
  - 29 • The Mini-International Neuropsychiatric Interview (MINI) is a short, diagnostic, and  
30 structured interview that is used for diagnosing major Axis I psychiatric disorders in  
31 DSM-V and ICD-10.<sup>27</sup> The MINI tool was employed and validated through several  
32 studies, particularly for diagnosing depression disorders.<sup>28,29</sup>  
33  
34  
35  
36  
37  
38  
39  
40  
41  
42  
43  
44

### 45 **Translation**

46  
47  
48 First, the standard English versions of the EPDS and BDI-II tools were retrieved. Then, they  
49 were translated to Arabic by a bilingual clinician whose primary language is Arabic and is  
50 familiar with the terminology of the area covered by the instrument (Forward translation).  
51  
52  
53 Next, a panel consisting of one clinician, a researcher in the field, and the aforementioned  
54 translator checked the expressions and concepts of the Arabic version for any discrepancy in  
55 comparison to the original English one. Any significant difference was corrected in  
56  
57  
58  
59  
60

1  
2  
3 consensus and the final Arabic versions were translated back to English by an independent  
4 bilingual clinician whose mother tongue was English. After the back-translation ensured the  
5 accuracy of the translated versions, they were piloted on a sample of 20 pregnant women.  
6  
7 The pilot testing aimed to check if the Arabic versions were clear and understandable among  
8 study subjects as well as interviewers, where the piloted sample was excluded from analyses.  
9

### 14 **Statistical analysis**

- 17 • The socio-demographic and clinical characteristics were summarized using descriptive  
18 statistics in the form of means and standard deviations for quantitative variables as well as  
19 frequency and percentages for categorical variables. Additionally, bivariate analyses were  
20 conducted through the chi-square or Fisher's exact tests to compare the association  
21 between the dependent (antenatal depression) and independent variable (socio-  
22 demographic and clinical characteristics).  
23
- 24 • The receiver operating characteristic (ROC) analysis was employed to measure the  
25 accuracy of the EPDS and BDI-II in diagnosing major depression according to DSM-V  
26 criteria. Afterwards, Youden's index ( $J = \text{Sensitivity} + \text{Specificity} - 1$ ) was used to  
27 determinate the best cut-off points for antenatal depression screening. Also, Cronbach's  
28 alpha ( $\alpha$ ) was employed as an estimate of scale reliability, internal consistency, and item  
29 homogeneity.  
30
- 31 • To examine the concordance among the psychometric scales tested, the Pearson  
32 correlation coefficient ( $r$ ) was calculated. In addition, a Principal Component Analysis  
33 (PCA) was carried out on the EPDS and BDI-II tools to identify subsets the components of  
34 the tools contributing to the most of the variance. The convergent construct validity of the  
35 EPDS was demonstrated through a rotated component matrix (varimax rotation). The  
36 Kaiser-Meyer-Olkin (KMO) values were considered for measuring sampling adequacy.  
37  
38  
39  
40  
41  
42  
43  
44  
45  
46  
47  
48  
49  
50  
51  
52  
53  
54  
55  
56  
57  
58  
59  
60

- The analysis was conducted using the Statistical Package for the Social Sciences (SPSS v.23) based on a preset significant level of .05.

## RESULTS

### 3.1 Demographic characteristics

One hundred and twenty-eight (128) pregnant women matched the inclusion criteria and accepted to participate in the current study. Table 1 presents the background characteristics of the study participants, where most of the pregnant women were non-Qatari Arabs (82%), holding a diploma or university degree (70%), unemployed (55%), with a monthly family income >10,000 QR (75%), multigravid (71%), and in the second trimester of their pregnancy (48%). Additionally, the mean age of the participants was 28.8 (SD=5 years).

**Table 1:** Socio demographic and clinical characteristics of the study sample (n=128)

|                                   | MINI-diagnostic |                | Total (n) | $\chi^2$ | p value      |
|-----------------------------------|-----------------|----------------|-----------|----------|--------------|
|                                   | Positive n (%)  | Negative n (%) |           |          |              |
| <b>Age (years)</b>                |                 |                |           |          |              |
| 20-34                             | 31(26)          | 87(74)         | 118       | 0.87     | <b>0.46</b>  |
| 35-46                             | 4 (40)          | 6(60)          | 10        |          |              |
| <b>Nationality</b>                |                 |                |           | 0.053    | <b>0.817</b> |
| Qatari                            | 6(23.1)         | 17(73.9)       | 23        |          |              |
| Other Arabs                       | 25(23.8)        | 80(79.2)       | 105       |          |              |
| <b>Trimester</b>                  |                 |                |           | 1.56     | <b>0.457</b> |
| 1 <sup>st</sup> trimester         | 8(29.6)         | 19(70.4)       | 27        |          |              |
| 2 <sup>nd</sup> trimester         | 12(19.4)        | 50(80.6)       | 62        |          |              |
| 3 <sup>rd</sup> trimester         | 11(28.2)        | 28(71.8)       | 39        |          |              |
| <b>Gravida</b>                    |                 |                |           | 0.224    | <b>0.636</b> |
| Primigravida                      | 10(73)          | 27(27.8)       | 37        |          |              |
| Multigravida                      | 21(23.1)        | 70(76.9)       | 91        |          |              |
| <b>Family Monthly income (QR)</b> |                 |                |           | 4.5      | <b>0.1</b>   |
| < 10.000 QR                       | 7(22.6)         | 24(77.4)       | 31        |          |              |
| 10.000 - < 20.000 QR              | 20(37)          | 34(63)         | 54        |          |              |
| ≥ 20.000 QR                       | 8(18.6)         | 35(81.4)       | 43        |          |              |

|                            |          |          |    |       |               |
|----------------------------|----------|----------|----|-------|---------------|
| <b>Number of children</b>  |          |          |    |       |               |
| zero                       | 10(26.3) | 28(73.7) | 38 | 1.48  | <b>0.685</b>  |
| [1-3]                      | 19(22.9) | 64(77.1) | 83 |       |               |
| [4-5]                      | 2(40)    | 3(60)    | 5  |       |               |
| ≥ 6                        | 0(0)     | 2(100)   | 2  |       |               |
| <b>Educational level*</b>  |          |          |    |       |               |
| Higher education           | 18(20)   | 72(80)   | 90 | 9.1   | <b>0.027*</b> |
| Secondary education        | 7(25.9)  | 20(74.1) | 27 |       |               |
| Primary education          | 6(54.5)  | 5(45.5)  | 11 |       |               |
| <b>Occupational Status</b> |          |          |    |       |               |
| Housewife                  | 20(28.2) | 51(71.8) | 71 | 1.828 | <b>0.4</b>    |
| Employed                   | 8(17.4)  | 38(82.6) | 46 |       |               |
| Student                    | 3(27.3)  | 8(27.7)  | 11 |       |               |
| <b>Family size*</b>        |          |          |    |       |               |
| Small family size(<5)      | 11(14.7) | 64(85.3) | 75 | 11.63 | <b>0.003*</b> |
| Average family size(=5)    | 10(50)   | 10(50)   | 20 |       |               |
| Large family size(>5)      | 10(30.3) | 23(69.7) | 33 |       |               |

\*  $p \leq .05$ /a=Fisher test/ Chi-square SD: Standard Deviation - QR: Qatari Riyals

### 3.2. Psychometric properties of the scales

#### 3.2.1. Reliability

The internal consistency of the EPDS and BDI-II scales was calculated at  $\alpha = 0.865$  and  $0.90$  respectively. Using Lawshe's method, an expert panel of three clinicians evaluated the questionnaire for the necessity of items, their grammar, wording, and scaling. The necessity of each item was assessed using a 3-point rating scale: (a) not necessary, (b) useful but not essential, and (c) essential. The universal agreement between the three raters was 78% for the EPDS (intra-class correlation coefficient  $r = 0.78$  [CI 0.16-0.94]) and 59% for the BDI-II (intra-class correlation coefficient  $r = 0.59$  [CI 0.033-0.9]).

#### 3.2.2. Cut-offs

Based on Youden's index, the following cut-off scores were determined: A score  $\geq 13$  on the EPDS (87% sensitivity, 90% specificity) and  $\geq 19$  on the BDI-II (96% sensitivity, 73% specificity) (Table 2).

**Table 2:** The psychometric properties of the EPDS and BDI-II Scales



|        | Cut-off | Sensitivity | Specificity | Corrected classified | LR+  | LR-    | Youden's Index |
|--------|---------|-------------|-------------|----------------------|------|--------|----------------|
| EPDS   | ≥8      | 96%         | 64%         | 46.2%                | 2.66 | 0.062  | 60%            |
|        | ≥9      | 96%         | 68%         | 49.2%                | 3    | 0.0058 | 64%            |
|        | ≥10     | 96%         | 76%         | 55.6%                | 4    | 0.0052 | 72%            |
|        | ≥11     | 90%         | 83%         | 62.2%                | 5.29 | 0.12   | 73%            |
|        | ≥12     | 87%         | 88%         | 69.2%                | 7.25 | 0.15   | 75%            |
|        | ≥13     | 87%         | 90%         | 77.1%                | 8.7  | 0.14   | 77%            |
|        | ≥14     | 71%         | 99%         | 84.6%                | 17.3 | 0.29   | 71%            |
| BDI-II | ≥18     | 96%         | 63%         | 46%                  | 2.59 | 0.063  | 59%            |
|        | ≥19     | 96%         | 73%         | 51.7%                | 3.5  | 0.05   | 69%            |
|        | ≥20     | 90%         | 76%         | 53.8%                | 3.75 | 0.13   | 66%            |
|        | ≥21     | 90%         | 77%         | 54%                  | 3.9  | 0.12   | 67%            |
|        | ≥22     | 80%         | 80%         | 55.6%                | 4    | 0.25   | 60%            |
|        | ≥23     | 74%         | 82%         | 56.1%                | 4.1  | 0.31   | 56%            |
|        | ≥24     | 67%         | 84%         | 56.8%                | 4.18 | 0.39   | 51%            |

*Note:* EPDS: Edinburgh Postnatal Depression Scale; BDI-II: Beck Depression Inventory; LR: Likelihood ratio

### 3.2.3 Validity

Using ROC analysis, the area under the curve (AUC) was calculated at 0.951 (SE=0.02; 95%CI= 0.91-0.99) for EPDS and 0.912 (SE=0.025; 95%CI=0.86–0.96) for BDI (Figure 1).

### 3.2.4 Correlation

The correlation established between EPDS and BDI-II was 60% which represent a weak uphill linear correlation (Figure 2).

### 3.2.5 Construct validity

Principle component analyses (PCA) was conducted for the EPDS and BDI-II scales (Figure 3). The analysis suggested that two components of the EPDS explain most of the variance with a cumulative percentage of 58%. The two components were item 2 (sadness) and item 8 (optimism). The convergent construct validity of EPDS was demonstrated through a rotated component matrix of 0.75, which is acceptable and significant (p=0.01). Discriminant

1  
2  
3 validity was supported because no violations were seen in the correlation matrix. Also, the  
4  
5 scree plot of the BDI-II suggests that four components explain most of the variance with a  
6  
7 cumulative percentage of 65.2%. These four factors were item 7 (self-dislike), item 2  
8  
9 (pessimistic), item 3 (past failure), and item 6 (punishment feeling). The convergent construct  
10  
11 validity of the BDI-II was weak as seen through a rotated component matrix of 0.45. No  
12  
13 violations were noted in the correlation matrix, hence supporting discriminant validity. The  
14  
15 Kaiser-Meyer-Olkin (KMO) values were considered for measuring sampling adequacy for  
16  
17 each factor analysis and it showed to be 0.872 ( $p < 0.001$ ).  
18  
19

20  
21 **Figure (1):** Receiving operating characteristic (ROC) curves of the EPDS and BDI-II scales

22  
23 **Figure (2):** Correlation between EPDS and BDI-II

24  
25 **Figure (3):** Scree plots of EPDS and BDI-II

## 26 27 28 **DISCUSSION**

29  
30 In the current study, a similar prevalence rate of antenatal depression was found through the  
31  
32 EPDS and MINI-interview tools at 27.3% and 24% respectively. However, the BDI -II  
33  
34 detected a higher prevalence at 45.3%. Overall, the EPDS was found to be superior to the  
35  
36 BDI-II because the positive predictive value of the former (0.75) was much higher than that  
37  
38 of the latter (0.54).  
39

40  
41 Given that the positive predictive value could be influenced by the actual prevalence of the  
42  
43 disease, the likelihood ratio was calculated and revealed that the EPDS had a higher positive  
44  
45 likelihood ratio, nearly triple that of the BDI-II. Additionally, the EPDS showed a higher  
46  
47 Youden's Index. So, the EPDS demonstrated a better performance and was the more useful  
48  
49 screening tool for antenatal depression in Qatar.  
50

51  
52 The previously mentioned result is consistent with that of a systematic review on AD  
53  
54 screening instruments across low resource settings, which revealed an apparent superiority  
55  
56 for EPDS (AUC = 0.96) with a pooled sensitivity and specificity of 0.80 and 0.81  
57  
58 respectively.<sup>9</sup> Similarly, a meta-analysis on the reliability and validity of perinatal depression  
59  
60

1  
2  
3 screening instruments for perinatal depression in African countries concluded that the EPDS  
4 was the most reliable and valid tool.<sup>30</sup> On the other hand, the current results oppose those  
5 reported from a similar validation study in Brazil, where the BDI-II was found to be the best-  
6 performing screening instrument (AUC=0.9) and showed higher accuracy than the EPDS  
7 (AUC=0.85).<sup>12</sup>

8  
9  
10  
11  
12  
13  
14 In addition to that, a key question was which cut-off point will reveal the maximum  
15 dichotomy between the depressed and non-depressed patients and result in further  
16 intervention. The current study revealed that the best cut-off value for the EPDS was  $\geq 13$ ,  
17 which is consistent with that obtained from studies in Saudi Arabia, Oman, and New  
18 Zealand.<sup>3,4,17</sup> Additionally, a score above 13 was identified as the optimal EPDS cut-off point  
19 by a recent study in Japan. On the other hand, the study yielded an area under the curve of  
20 0.956 as well as a sensitivity and specificity of 90% and 92.1% respectively.<sup>18</sup> whereas, an  
21 EPDS cut-off value  $\geq 9$  was the most optimal in African countries. The aforementioned value  
22 was associated with a pooled sensitivity and specificity of 0.94 and 0.77 respectively.<sup>30</sup>  
23  
24 Another study in Spain showed that EPDS cut-off value  $\geq 10$  (AUC of 0.76, sensitivity of  
25 72.4%, specificity of 79.3%, PPV of 18.2%, NPV of 97.8%, and OA of 78.9%).<sup>15</sup>

26  
27  
28  
29  
30  
31  
32  
33  
34  
35  
36  
37  
38  
39  
40 Regarding the BDI-II tool, the results showed that a cut-off value  $\geq 19$  distinguishes the most  
41 between depressed and non-depressed expecting mothers. In contrast, the previously  
42 mentioned validation study in Brazil determined that the optimal cut-off value was  $\geq 16$ .<sup>12</sup>  
43  
44 Also, a much lower BDI score (11/12) was identified as the optimal cut-off point among  
45 pregnant women in Taiwan, at which the sensitivity and the specificity were 74% and 83%  
46 respectively.<sup>31</sup> Such variation of results across different settings highlights the importance of  
47 validation studies to identify the most appropriate screening tool and associated cut-off value  
48 in each population.  
49  
50  
51  
52  
53  
54  
55  
56  
57  
58  
59  
60

1  
2  
3 In order to minimize the selection bias, the sample taken in this study included pregnant  
4 women during all trimesters of pregnancy in the first (21%), second (48%), and third (30%)  
5 trimester of pregnancy. This has been supported by the recommendation of the USPSTF  
6 which underlines the importance of screening pregnant women for antenatal depression  
7 regardless of their gestational age.<sup>7</sup> In addition to that, a study conducted in Saudi Arabia  
8 found an insignificant difference in the prevalence of antenatal depression across different  
9 trimesters.<sup>3</sup> However, a study conducted in Korea concluded that the highest prevalence of  
10 antenatal depression occurred during the third trimester (61.4%).<sup>14</sup> On the other hand, another  
11 study from Nigeria determined that the first trimester entailed the higher burden of antenatal  
12 depression with a prevalence of 27.5%.<sup>16</sup>

13  
14 This was the first study in the State of Qatar to identify the most suitable screening tool for  
15 antenatal depression. The study sample in the current study was derived from a  
16 heterogeneous population of pregnant women, regardless the gestational age, attending nine  
17 primary health centers across the country. Furthermore, the investigators were blinded to the  
18 results to avoid any interviewer bias. Also, the examined screening tools in the study were  
19 compared with the golden standard tool (MINI). Similarly, the construct validity of the EPDS  
20 has been demonstrated in the current study. The aforementioned factors allow for the  
21 universal administration of the EPDS as a screening tool in Qatar's primary health care  
22 setting. One of the limitations in this study was the inability to use the Structured Clinical  
23 Interview for DSM-5 (SCID-5) as a tool for diagnosing antenatal depression.<sup>32</sup> The reason  
24 behind this was the need for lengthy appointments, which was not feasible because such  
25 action will interrupt the general workflow at the antenatal care clinic of the primary health  
26 care center.

27  
28 In conclusion, the current study shows that the EPDS is superior to BDI-II as an antenatal  
29 depression screening tool at the primary health care level in Qatar. The EPDS was found to  
30

1  
2  
3 have better psychometric properties in comparison to the BDI-II tool. Ultimately, the proper  
4 use of the aforementioned screening tools along with their cut-off values will help in the early  
5 identification of AD among pregnant women in Qatar. As a result, such step will help raise  
6 awareness about antenatal depression and alleviate some of its burden in the country.  
7  
8  
9  
10  
11  
12

### 13 **Acknowledgments**

14  
15  
16 None.  
17  
18

### 19 **Competing Interests**

20  
21  
22 The authors declare no conflict of interest.  
23  
24

### 25 **Funding**

26  
27  
28 None.  
29  
30  
31

### 32 **Ethical**

33  
34  
35 This study was approved by the Institutional Review Board of the Primary Health Care  
36 Corporation under protocol ID (PHCC/RC/18/06/002).  
37  
38  
39

### 40 **Author contributor ship**

41  
42  
43 SN designed the study, performed the statistical analysis, interpretation of the results and  
44 drafted the manuscript. NAK and IB helped in designing the study. MC and AA helped in  
45 data analysis and participated in the preparation of the manuscript. NA helped in data  
46 collection, entry, and interpretation. All authors revised and approved the final version of the  
47 manuscript. Each author contributed important intellectual content during manuscript drafting  
48 or revision and accepts accountability for the overall work by ensuring that questions  
49 pertaining to the accuracy or integrity of any portion of the work are appropriately  
50 investigated and resolved.  
51  
52  
53  
54  
55  
56  
57  
58  
59  
60

1  
2  
3  
4  
5  
6  
7  
8  
9  
10  
11  
12  
13  
14  
15  
16  
17  
18  
19  
20  
21  
22  
23  
24  
25  
26  
27  
28  
29  
30  
31  
32  
33  
34  
35  
36  
37  
38  
39  
40  
41  
42  
43  
44  
45  
46  
47  
48  
49  
50  
51  
52  
53  
54  
55  
56  
57  
58  
59  
60

**Data sharing**

All data relevant to the study are included in the article.

For peer review only

## References

1. Cohen N. Public health perspectives on depressive disorders. Baltimore: John Hopkins University, 2017:281.
2. World Health Organization (WHO). WHO Maternal mental health. WHO; 2017. Available from: [http://www.who.int/mental\\_health/maternal-child/maternal\\_mental\\_health/en/](http://www.who.int/mental_health/maternal-child/maternal_mental_health/en/)[accessed 17 April 2018]
3. Alotaibe H, Elsaid T, Almomen R. The prevalence and risk factors for antenatal depression among pregnant women attending clinics in Riyadh, Saudi Arabia. *EJPMR* 2016;3:60-67 .
4. Al-Azri M, Al-Lawati I, Al-Kamyani R, et al. Prevalence and Risk Factors of Antenatal Depression among Omani Women in a Primary Care Setting: Cross-sectional study. *Sultan Qaboos Univ Med J* 2016;16:e35-41.
5. World health Organization (WHO). Thinking healthy a manual for psychosocial management for perinatal depression. WHO; 2015. Available from: [http://apps.who.int/iris/bitstream/10665/152936/1/WHO\\_MSD\\_MER\\_15.1\\_eng.pdf?ua=1&ua=1](http://apps.who.int/iris/bitstream/10665/152936/1/WHO_MSD_MER_15.1_eng.pdf?ua=1&ua=1)[accessed 17 April 2018]
6. World Health Organization (WHO). WHO Interventions for common perinatal mental disorders in women in low- and middle-income countries: a systematic review and meta-analysis .WHO; 2013. Available from: <http://www.who.int/bulletin/volumes/91/8/12-109819/en/> [accessed 31 December 2018].
7. O'Connor E, Rossom R, Henninger M, et al. Primary Care Screening for and Treatment of Depression in Pregnant and Postpartum Women. *JAMA* 2016;315:388.
8. Siu A, Bibbins-Domingo K, Grossman D, et al. Screening for Depression in Adults. *JAMA* 2016;315:380.
9. Chorwe-Sungani G, Chipps J. A systematic review of screening instruments for depression for use in antenatal services in low resource settings. *BMC Psychiatry* 2017;17.
10. Yonkers K, Smith M, Gotman N, et al. Typical somatic symptoms of pregnancy and their impact on a diagnosis of major depressive disorder. *Gen Hosp Psychiatry* 2009;31:327-333.
11. Nylen K, Williamson J, O'Hara M, et al. Validity of somatic symptoms as indicators of depression in pregnancy. *Arch Womens Ment Health* 2013;16:203-210.
12. Castro e Couto T, Martins Brancaglion M, Nogueira Cardoso M, et al. What is the best tool for screening antenatal depression?. *J Affect Disord* 2015;178:12-17.
13. Lholcombjr W, Sstone L, Jlustman P, et al. Screening for depression in pregnancy: Characteristics of the Beck Depression Inventory. *Obstet Gynecol* 1996;88:1021-1025.
14. Park J, Karmaus W, Zhang H. Prevalence of and Risk Factors for Depressive Symptoms in Korean Women throughout Pregnancy and in Postpartum Period. *Asian Nurs Res* 2015;9:219-225.
15. Vázquez MB, Míguez MC. Validation of the Edinburgh postnatal depression scale as a screening tool for depression in Spanish pregnant women. *Journal of Affective Disorders*. 2019; 246:515-521.
16. Thompson O, Ajayi I. Prevalence of Antenatal Depression and Associated Risk Factors among Pregnant Women Attending Antenatal Clinics in Abeokuta North Local Government Area, Nigeria. *Depress Res Treat* 2016;1-15.
17. Waldie K, Peterson E, D'Souza S, et al. Depression symptoms during pregnancy: Evidence from Growing Up in New Zealand. *J Affect Disord* 2015;186:66-73.

18. Usuda K, Nishi D, Okazaki E, et al. Optimal cut-off score of the Edinburgh Postnatal Depression Scale for major depressive episode during pregnancy in Japan. *Psychiatry Clin Neurosci* 2017;71:836-842.
19. Ministry of public health (MOPH). Qatar health report 2013. Qatar: MOPH;2013.
20. Qatar Statistics Authority (QSA). Planning and Statistics Authority (PSA). .Qatar statistics authority Census; 2010.; Available:www.qsa.gov.qa. [cited2018May 29]
21. Ministry of Public Health (MOPH). Qatar National Health Strategy 2018-2022. MOPH; P10-14.
22. Primary Health Care Corporation (PHCC). Corporate Strategic Plan 2019-2023.PHCC;2019.
23. Primary Health Care Corporation (PHCC). Antenatal Care Report. Doha: Primary Health Care Corporation. PHCC; 2012.
24. Mathers N, Fox N, Hunn A. Surveys and Questionnaires. The NIHR RDS for the East Midlands / Yorkshire & the Humber. The NIHR Research Design Service for Yorkshire & the Humber 2007.
25. Cox JL, Holden JM, Segovsky R. Detection of postnatal depression: Development of the 10-item Edinburgh Postnatal Depression Scale. *Br J Psychiatry* 1987;150:782-786.
26. Hendrick V. Psychiatric Disorders in Pregnancy and the Postpartum. Dordrecht: Springer 2008:14.
27. Sheehan D, Lecrubier Y, Harnett Sheehan K, et al. The validity of the Mini International Neuropsychiatric Interview (MINI) according to the SCID-P and its reliability. *Eur Psychiatry* 1997;12:232-241.
28. Onah M, Field S, Bantjes J, et al. Perinatal suicidal ideation and behaviour: psychiatry and adversity. *Arch Women's Ment Health* 2016;20:321-331.
29. Pettersson A, Modin S, Wahlström R, et al. The Mini-International Neuropsychiatric Interview is useful and well accepted as part of the clinical assessment for depression and anxiety in primary care: a mixed-methods study. *BMC Fam Pract* 2018;19.
30. Tsai A, Scott J, Hung K, et al. Reliability and Validity of Instruments for Assessing Perinatal Depression in African Settings: Systematic Review and Meta-Analysis. *PLoS ONE* 2013;8:e82521.
31. Su K, Chiu T, Huang C, et al. Different cutoff points for different trimesters? The use of Edinburgh Postnatal Depression Scale and Beck Depression Inventory to screen for depression in pregnant Taiwanese women. *Gen Hosp Psychiatry* 2007;29:436-441.
32. American Psychiatry Association (APA).Structured Clinical Interview for DSM-5 (SCID-5) .Appi.org. 2017 Available from: <https://www.appi.org/products/structured-clinical-interview-for-dsm-5-scid-5>[accessed 25 December 2018].



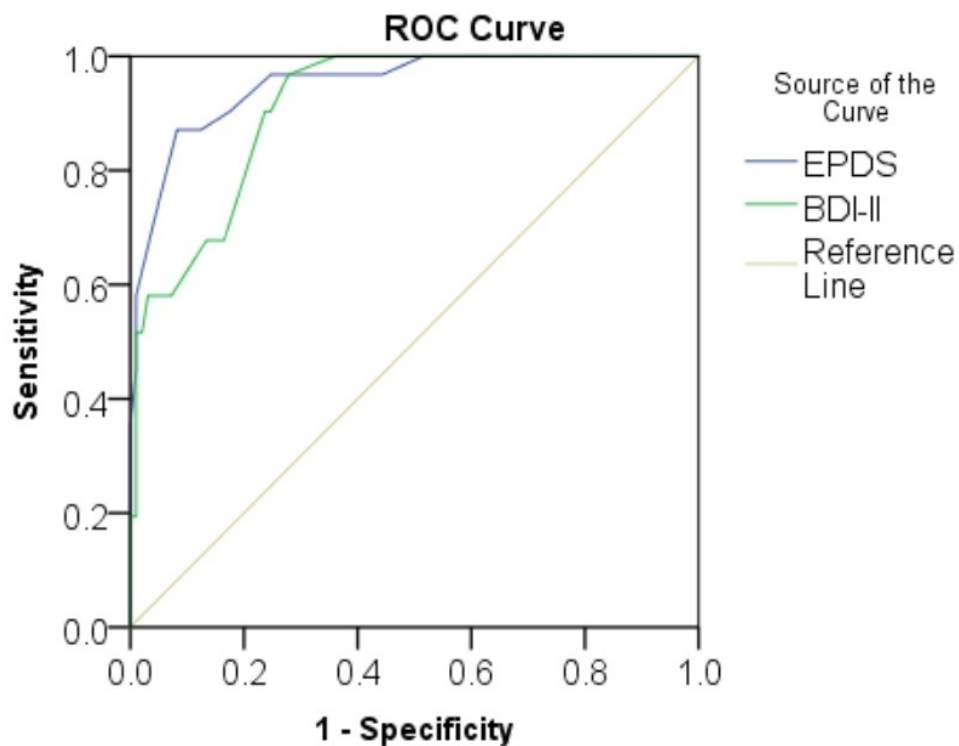

Diagonal segments are produced by ties.

Figure (1): Receiving operating characteristic (ROC) curves of the EPDS and BDI-II scales

1  
2  
3  
4  
5  
6  
7  
8  
9  
10  
11  
12  
13  
14  
15  
16  
17  
18  
19  
20  
21  
22  
23  
24  
25  
26  
27  
28  
29  
30  
31  
32  
33  
34  
35  
36  
37  
38  
39  
40  
41  
42  
43  
44  
45  
46  
47  
48  
49  
50  
51  
52  
53  
54  
55  
56  
57  
58  
59  
60

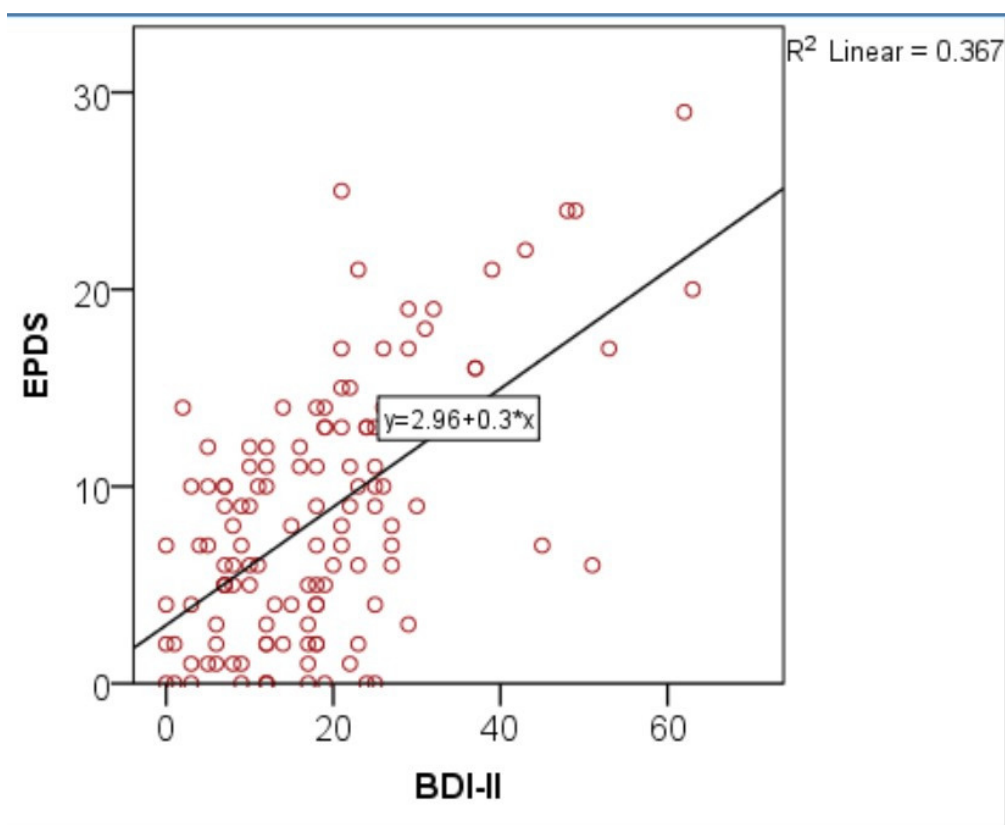

Figure (2): Correlation graph of the EPDS and BDI-II scales  
69x56mm (300 x 300 DPI)

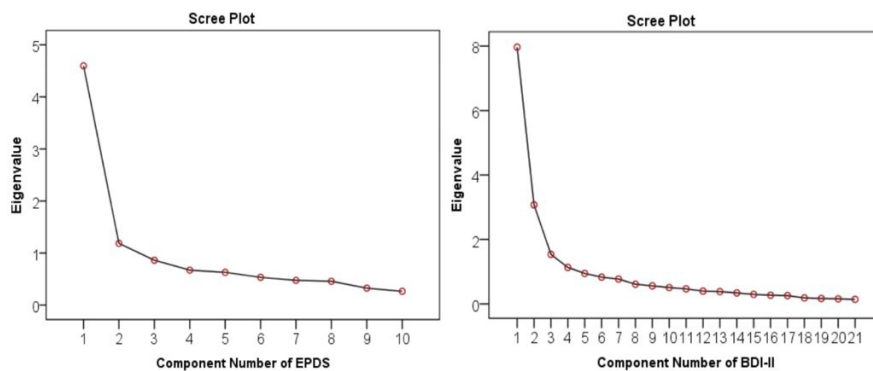

Figure (3): Scree plots of the EPDS and BDI-II scales

# BMJ Open

## Psychometric properties of the Arabic version of EPDS and BDI-II as a screening tool for antenatal depression: Evidence from Qatar

|                                 |                                                                                                                                                                                                                                                                                                   |
|---------------------------------|---------------------------------------------------------------------------------------------------------------------------------------------------------------------------------------------------------------------------------------------------------------------------------------------------|
| Journal:                        | <i>BMJ Open</i>                                                                                                                                                                                                                                                                                   |
| Manuscript ID                   | bmjopen-2019-030365.R3                                                                                                                                                                                                                                                                            |
| Article Type:                   | Research                                                                                                                                                                                                                                                                                          |
| Date Submitted by the Author:   | 14-Aug-2019                                                                                                                                                                                                                                                                                       |
| Complete List of Authors:       | Naja, Sarah; Hamad Medical Corp, Community Medicine Al-Kubaisi, Noora; Primary Health Care Corp Chehab, Mohamad; Hamad Medical Corp, Community Medicine Al-Dahshan, Ayman; Hamad Medical Corp, Community Medicine Abuhashem, Nada ; Hamad Medical Corp Bougmiza , Iheb ; Primary Health Care Corp |
| <b>Primary Subject Heading</b>: | Mental health                                                                                                                                                                                                                                                                                     |
| Secondary Subject Heading:      | Evidence based practice, General practice / Family practice, Mental health, Obstetrics and gynaecology, Qualitative research                                                                                                                                                                      |
| Keywords:                       | MENTAL HEALTH, antenatal depression, validation studies, Edinburgh Postnatal Depression Scale, Beck Depression Inventory-II, Mini International Neuropsychiatric Interview                                                                                                                        |
|                                 |                                                                                                                                                                                                                                                                                                   |

SCHOLARONE™  
Manuscripts

1  
2  
3  
4 **Psychometric properties of the Arabic version of EPDS and BDI-II as a screening**  
5 **tool for antenatal depression: Evidence from Qatar**  
6  
7

8 Sarah Naja <sup>(1)\*</sup>, Noora Al Kubaisi <sup>(2)</sup>, Mohamad Chehab <sup>(1)</sup>, Ayman Al Dahshan <sup>(1)</sup>, Nada  
9  
10  
11 Abubashem <sup>(1)</sup>, Iheb Bougmiza <sup>(2)</sup>  
12

13 (1): Hamad Medical Corporation, Doha, Qatar; [dr.sj.naja@gmail.com](mailto:dr.sj.naja@gmail.com);

14  
15 [Mchehab2@hamad.qa](mailto:Mchehab2@hamad.qa), [aadahshan@hamad.qa](mailto:aadahshan@hamad.qa); [nadaadli@outlook.com](mailto:nadaadli@outlook.com)  
16  
17

18 (2): Primary Health Care Corporation, Doha, Qatar; [njalkubaisi@phcc.gov.qa](mailto:njalkubaisi@phcc.gov.qa);

19  
20 [mbougmiza@phcc.gov.qa](mailto:mbougmiza@phcc.gov.qa)  
21

22 **\*Correspondence:** Dr. Sarah Naja, Community Medicine Residency Program,

23  
24 Department of Medical Education, Hamad Medical Corporation, Doha, Qatar. P.O. Box

25  
26  
27 3050; [dr.sj.naja@gmail.com](mailto:dr.sj.naja@gmail.com)  
28

29 Main study was funded by HMC

30  
31 Word count: **3470**  
32  
33  
34  
35  
36  
37  
38  
39  
40  
41  
42  
43  
44  
45  
46  
47  
48  
49  
50  
51  
52  
53  
54  
55  
56  
57  
58  
59  
60

review only

## Abstract

**Objectives:** The current study aimed to validate and determine the psychometric properties of the Arabic versions of the Beck Depression Inventory-II (BDI-II) and the Edinburgh Postnatal Depression Scale (EPDS) in Qatar.

**Design:** A cross-sectional study design was employed.

**Setting:** Antenatal care (ANC) clinics at nine primary health care centers.

**Participants:** Pregnant women (n=128), aged 15-46 years in different trimesters of pregnancy, attending the ANC clinics as well as capable of reading as well as writing in the Arabic language.

**Results:** A total of 128 participants were enrolled. Upon conducting the receiver operating characteristic (ROC) analysis, the EPDS showed a larger area under the curve at 0.951 than the BDI-II tool (0.9). Using Youden's index, a score  $\geq 13$  on the EPDS (87% sensitivity, 90% specificity) and  $\geq 19$  on the BDI-II (96% sensitivity, 73% specificity) allowed for the greatest division between depressed and non-depressed participants.

**Conclusion:** To address the under-recognition of antenatal depression, physicians at primary health care centers in Qatar should be encouraged to utilize the EPDS to screen pregnant women seeking antenatal care services.

### Strengths and limitations of this study

- This was the first study in the State of Qatar to identify the most valid screening tool for antenatal depression. Furthermore, the study identified the optimal cut-off points for the Arabic versions of the EPDS and BDI-II among the pregnant population in the country.
- The sample in the current study was derived from a heterogeneous population of pregnant women across the Qatar.
- The examined screening tools in the study were compared with the golden standard (MINI) tool.

- 1  
2  
3 • One of the limitations of this study was the inability to use the Structured Clinical Interview  
4 for DSM-5 (SCID-5) as a tool for diagnosing antenatal depression.  
5  
6

7  
8 **Keywords:** mental health; antenatal depression; validation studies; Edinburgh Postnatal  
9  
10 Depression Scale; Beck Depression Inventory-II; Mini International Neuropsychiatric  
11  
12 Interview  
13

14  
15 **Conflict of Interest:** None declared  
16  
17  
18  
19  
20  
21  
22  
23  
24  
25  
26  
27  
28  
29  
30  
31  
32  
33  
34  
35  
36  
37  
38  
39  
40  
41  
42  
43  
44  
45  
46  
47  
48  
49  
50  
51  
52  
53  
54  
55  
56  
57  
58  
59  
60



## INTRODUCTION

Globally, maternal mental health problems are considered as a major public health challenge, where depression affects 10% of pregnant women in developed countries and 15.6% in the developing nations (WHO,2017).<sup>1,2</sup> Also, the variation in the prevalence of pregnancy-related depression from one country to another may be justified by the use of different measurement tools and methodologies among the different populations.

High figures were revealed in Arab Gulf countries, where antenatal depression was estimated to impact more than half (57.5%) of expecting mothers in Saudi Arabia and almost a quarter (24%) in Oman during 2016.<sup>3, 4</sup> However, pregnant women with mental disorders can be managed through effective and low-cost interventions after being properly screened by their health care providers.<sup>5, 6</sup>

The United States Preventive Services Task Force (USPSTF) encourages the identification of antenatal depression through screening all gravid women at the primary health care level, given the fact that antenatal depression is a serious, prevalent, and treatable disease (B recommendation).<sup>7</sup> Nevertheless, there is a lack of strong evidence regarding the best screening tool to be employed.<sup>8</sup>

In 2017, a published systematic review compared seven screening tools including the Edinburgh Postnatal Depression Scale (EPDS), Beck Depression Index (BDI-II), Centre for Epidemiologic Studies Depression Scale (CES-D), Hamilton Rating Scale for Depression (HRSD), Hopkins Symptoms Checklist (HSCL), Kessler Psychological Distress Scale (K10), and Self-Reporting Questionnaire (SRQ). The review concluded that the EPDS was the most suitable antenatal depression screening tool in low-resource settings due to its superior level of accuracy and sensitivity.<sup>9</sup>

Debatably, some researchers prefer EPDS as it excludes constitutional symptoms (e.g. changes in sleeping pattern and food habits) in the screening of antenatal depression as such



1  
2  
3 symptoms are considered uninformative and common in normal pregnancy .<sup>10</sup> On the other  
4  
5 hand, some scholars choose BDI-II , arguing that somatic symptoms are valid indicators and  
6  
7 these constitutional symptoms should not necessarily be dismissed as normative pregnancy  
8  
9 experiences.<sup>11</sup> Given the ease of administrating self-report measures in the clinical and  
10  
11 research settings, the decision to include or exclude the aforementioned symptoms is crucial  
12  
13 for decision-makers as it will affect their choice of the screening tool.  
14  
15

16  
17 The identification of an optimal cut-off point could be a key consideration when screening  
18  
19 pregnant women especially that literature reveals different cut-off points used among  
20  
21 different populations to distinguish between depressed and non-depressed pregnant women.  
22  
23 For BDI-II diverse cut-off points were used including a cut-off  $\geq 15$  in Brazil <sup>12</sup>, while higher  
24  
25 cut-off point  $\geq 16$  was used in Washington. <sup>13</sup> Similarly, For EPDS, a cut-off value of  $\geq 10$   
26  
27 was employed in Korea <sup>14</sup> and Spain, <sup>15</sup> while  $\geq 11$  was utilized in Nigeria <sup>16</sup>, and  $>13$  in New  
28  
29 Zealand as well as Japan.<sup>17,18</sup> This indicates that there is no international agreement on a  
30  
31 specific cut-off value for antenatal depression screening. Furthermore, the adequate  
32  
33 determination of this threshold in the screening process is necessary to decrease the false  
34  
35 positive and false negative rates and their relevant implications.  
36  
37  
38

39  
40 Qatar is a country located on the west coast of the Arabian Gulf and a member of the Gulf  
41  
42 Cooperation Council (GCC). During the past decade, the country has been home the world's  
43  
44 fastest growing population and second-highest migrant population. <sup>19</sup> The Arab population  
45  
46 currently constitutes about 27% of the total population (45% are Qatari and 55% are non-  
47  
48 Qatari). <sup>20</sup> Based on Qatar's new National Health Strategy (2018-22), there is a focus on  
49  
50 preventative strategies among specific vulnerable cohorts such as pregnant women. <sup>21</sup> Thus,  
51  
52 the country's main provider of primary health services, the Primary Health Care Corporation,  
53  
54 has aligned its corporate strategy with the National Health Strategy and is aiming at better  
55  
56 population health through early detection and screening programs by 2023. <sup>(22)</sup>  
57  
58  
59  
60

1  
2  
3 Unfortunately, there is a lack of evidence regarding the most valid screening tool to detect  
4 depression among pregnant women in the country. Thus, the objective of this study is to  
5 validate and determine the psychometric properties of the Beck Depression Inventory-II  
6 (BDI-II) and the Edinburgh Postnatal Depression Scale (EPDS) in Qatar.  
7  
8  
9

## 10 11 12 **Material and Methods**

13  
14 This study is part of a larger project that aimed to measure the prevalence of antenatal  
15 depression in Qatar at the Primary Health Care Corporation. The results of the pilot study in  
16 relation to the validation of the Arabic version of EPDS and BDI-21 are reported in this  
17 paper.  
18  
19  
20  
21  
22

### 23 24 **Study setting**

25  
26 This was a cross-sectional study conducted among Arab pregnant women attending the  
27 antenatal clinics of the Primary Health Care Corporation (PHCC) in Qatar. The data was  
28 collected during both morning and evening work shifts of the health centers and the data  
29 collection took place in August and September of 2018.  
30  
31  
32  
33  
34

35  
36 The primary health centers are the first line of contact between pregnant women and the  
37 healthcare system in the country with antenatal participation rate is high as (60%) of the total  
38 live births. PHCC provides accessible preventive, promotive, and curative services to the  
39 community in Qatar. At the time of the study, there were 23 antenatal clinics across the  
40 country and each clinic was operated by a Family Medicine Practitioner.<sup>23</sup>  
41  
42  
43  
44  
45  
46  
47

### 48 49 **Sampling Methods or strategy**

50  
51 A cluster random sampling technique was employed. First, the list of the primary health  
52 centers that provide antenatal services was obtained from the "Operations Department" at  
53 PHCC. The list also included the total number and percentage of pregnant women attending  
54 the ANC clinic in each health center and in total (23 centers during the study period).  
55  
56  
57  
58  
59  
60 Secondly, the *Automated Random Number Generator* technique was used to select randomly

1  
2  
3 nine health centers out of twenty-three. Thus, each selected health center was designated as a  
4 cluster. Finally, the nine selected health centers were visited by data collectors to enrol  
5 eligible participants on a daily basis until fulfilling the quota (n=128).  
6  
7  
8  
9

### 10 **Patient and public involvement**

11 We did not involve patients or the public in our work.  
12  
13  
14

### 15 **Sample size and participants**

16 In order to validate the aforementioned screening tools and identify their psychometric  
17 properties, the sample size was calculated at 100 to adequately estimate the sensitivity and  
18 specificity of the tools; given a margin of error of at most 5% and a 95% confidence  
19 interval.<sup>24</sup> To be included in the study, the participants had to be pregnant women (aged 15 -  
20 49 years), capable of reading and writing in the Arabic language, and granting a written  
21 consent. No restrictions were made regarding the specific trimester of pregnancy.  
22  
23  
24  
25  
26  
27  
28  
29  
30  
31  
32

### 33 **Research protocol**

34 The eligible pregnant women were first informed about the study and its objectives. After  
35 signing the consent form, the participants were briefly interviewed about their demographic  
36 and pregnancy-related characteristics. Afterwards, they were asked to complete the self-  
37 administrated Arabic versions of the EPDS and BDI-II tools before their scheduled antenatal  
38 care visit. Subsequently, the participants would directly undergo the Mini-International  
39 Neuropsychiatric Interview (MINI) with the primary care physician during their ANC visit to  
40 avoid any unwanted exposure or interference. Also, the aforementioned physicians were  
41 blinded to the results of the EPDS and BDI-II tools. Thus, the enrolled pregnant women were  
42 assessed for antenatal depression through the three tools during the same visit. As a result,  
43 any participant who was diagnosed positive for antenatal depression through the MINI tool  
44  
45  
46  
47  
48  
49  
50  
51  
52  
53  
54  
55  
56  
57  
58  
59  
60

1  
2  
3 was referred to specialised secondary care (psychiatrists) for further evaluation and  
4  
5 management.  
6  
7

### 8 9 **Data collection tools**

- 10  
11  
12
- 13 • An interview-based and structured questionnaire on sociodemographic and pregnancy-  
14 related characteristics (age, nationality, gravidity, trimester, family income, number of  
15 children, educational level, occupational status and family size).  
16  
17
  - 18 • The Edinburgh Postnatal Depression Scale (EPDS) is a self-administrated tool and was  
19 first published in the British Journal of Psychiatry during 1987. It consists of 10 items and  
20 has been validated for use in different populations.<sup>25</sup>  
21  
22
  - 23 • The Beck Depression Inventory (BDI-II), first introduced in 1961, is a brief 10-minutes  
24 self-administered questionnaire that can detect the presence of depressive symptoms. It  
25 consists of 21 questions pertaining to the various aspects of mood such as sadness,  
26 suicidal ideation, loss of weight, and social withdrawal.<sup>26</sup>  
27  
28
  - 29 • The Mini-International Neuropsychiatric Interview (MINI) is a short, diagnostic, and  
30 structured interview that is used for diagnosing major Axis I psychiatric disorders in  
31 DSM-V and ICD-10.<sup>27</sup> The MINI tool was employed and validated through several  
32 studies, particularly for diagnosing depression disorders.<sup>28,29</sup>  
33  
34  
35  
36  
37  
38  
39  
40  
41  
42  
43  
44

### 45 **Translation**

46  
47  
48 First, the standard English versions of the EPDS and BDI-II tools were retrieved. Then, they  
49 were translated to Arabic by a bilingual clinician whose primary language is Arabic and is  
50 familiar with the terminology of the area covered by the instrument (Forward translation).  
51  
52  
53 Next, a panel consisting of one clinician, a researcher in the field, and the aforementioned  
54 translator checked the expressions and concepts of the Arabic version for any discrepancy in  
55 comparison to the original English one. Any significant difference was corrected in  
56  
57  
58  
59  
60

1  
2  
3 consensus and the final Arabic versions were translated back to English by an independent  
4 bilingual clinician whose mother tongue was English. After the back-translation ensured the  
5 accuracy of the translated versions, they were piloted on a sample of 20 pregnant women.  
6  
7 The pilot testing aimed to check if the Arabic versions were clear and understandable among  
8 study subjects as well as interviewers, where the piloted sample was excluded from analyses.  
9

### 14 **Statistical analysis**

- 17 • The socio-demographic and clinical characteristics were summarized using descriptive  
18 statistics in the form of means and standard deviations for quantitative variables as well as  
19 frequency and percentages for categorical variables. Additionally, bivariate analyses were  
20 conducted through the chi-square or Fisher's exact tests to compare the association  
21 between the dependent (antenatal depression) and independent variable (socio-  
22 demographic and clinical characteristics).  
23
- 24 • The receiver operating characteristic (ROC) analysis was employed to measure the  
25 accuracy of the EPDS and BDI-II in diagnosing major depression according to DSM-V  
26 criteria. Afterwards, Youden's index ( $J = \text{Sensitivity} + \text{Specificity} - 1$ ) was used to  
27 determinate the best cut-off points for antenatal depression screening. Also, Cronbach's  
28 alpha ( $\alpha$ ) was employed as an estimate of scale reliability, internal consistency, and item  
29 homogeneity.  
30
- 31 • To examine the concordance among the psychometric scales tested, the Pearson  
32 correlation coefficient ( $r$ ) was calculated. In addition, a Principal Component Analysis  
33 (PCA) was carried out on the EPDS and BDI-II tools to identify subsets the components of  
34 the tools contributing to the most of the variance. The convergent construct validity of the  
35 EPDS was demonstrated through a rotated component matrix (varimax rotation). The  
36 Kaiser-Meyer-Olkin (KMO) values were considered for measuring sampling adequacy.  
37  
38  
39  
40  
41  
42  
43  
44  
45  
46  
47  
48  
49  
50  
51  
52  
53  
54  
55  
56  
57  
58  
59  
60

- The analysis was conducted using the Statistical Package for the Social Sciences (SPSS v.23) based on a preset significant level of .05.

## RESULTS

### 3.1 Demographic characteristics

One hundred and twenty-eight (128) pregnant women matched the inclusion criteria and accepted to participate in the current study. Table 1 presents the background characteristics of the study participants, where most of the pregnant women were non-Qatari Arabs (82%), holding a diploma or university degree (70%), unemployed (55%), with a monthly family income >10,000 QR (75%), multigravid (71%), and in the second trimester of their pregnancy (48%). Additionally, the mean age of the participants was 28.8 (SD=5 years).

**Table 1:** Socio demographic and clinical characteristics of the study sample (n=128)

|                                   | MINI-diagnostic |                | Total (n) | $\chi^2$ | p value      |
|-----------------------------------|-----------------|----------------|-----------|----------|--------------|
|                                   | Positive n (%)  | Negative n (%) |           |          |              |
| <b>Age (years)</b>                |                 |                |           |          |              |
| 20-34                             | 31(26)          | 87(74)         | 118       | 0.87     | <b>0.46</b>  |
| 35-46                             | 4 (40)          | 6(60)          | 10        |          |              |
| <b>Nationality</b>                |                 |                |           | 0.053    | <b>0.817</b> |
| Qatari                            | 6(23.1)         | 17(73.9)       | 23        |          |              |
| Other Arabs                       | 25(23.8)        | 80(79.2)       | 105       |          |              |
| <b>Trimester</b>                  |                 |                |           | 1.56     | <b>0.457</b> |
| 1 <sup>st</sup> trimester         | 8(29.6)         | 19(70.4)       | 27        |          |              |
| 2 <sup>nd</sup> trimester         | 12(19.4)        | 50(80.6)       | 62        |          |              |
| 3 <sup>rd</sup> trimester         | 11(28.2)        | 28(71.8)       | 39        |          |              |
| <b>Gravida</b>                    |                 |                |           | 0.224    | <b>0.636</b> |
| Primigravida                      | 10(73)          | 27(27.8)       | 37        |          |              |
| Multigravida                      | 21(23.1)        | 70(76.9)       | 91        |          |              |
| <b>Family Monthly income (QR)</b> |                 |                |           | 4.5      | <b>0.1</b>   |
| < 10.000 QR                       | 7(22.6)         | 24(77.4)       | 31        |          |              |
| 10.000 - < 20.000 QR              | 20(37)          | 34(63)         | 54        |          |              |
| ≥ 20.000 QR                       | 8(18.6)         | 35(81.4)       | 43        |          |              |

|                            |          |          |    |       |               |
|----------------------------|----------|----------|----|-------|---------------|
| <b>Number of children</b>  |          |          |    |       |               |
| zero                       | 10(26.3) | 28(73.7) | 38 | 1.48  | <b>0.685</b>  |
| [1-3]                      | 19(22.9) | 64(77.1) | 83 |       |               |
| [4-5]                      | 2(40)    | 3(60)    | 5  |       |               |
| ≥ 6                        | 0(0)     | 2(100)   | 2  |       |               |
| <b>Educational level*</b>  |          |          |    |       |               |
| Higher education           | 18(20)   | 72(80)   | 90 | 9.1   | <b>0.027*</b> |
| Secondary education        | 7(25.9)  | 20(74.1) | 27 |       |               |
| Primary education          | 6(54.5)  | 5(45.5)  | 11 |       |               |
| <b>Occupational Status</b> |          |          |    |       |               |
| Housewife                  | 20(28.2) | 51(71.8) | 71 | 1.828 | <b>0.4</b>    |
| Employed                   | 8(17.4)  | 38(82.6) | 46 |       |               |
| Student                    | 3(27.3)  | 8(27.7)  | 11 |       |               |
| <b>Family size*</b>        |          |          |    |       |               |
| Small family size(<5)      | 11(14.7) | 64(85.3) | 75 | 11.63 | <b>0.003*</b> |
| Average family size(=5)    | 10(50)   | 10(50)   | 20 |       |               |
| Large family size(>5)      | 10(30.3) | 23(69.7) | 33 |       |               |

\*  $p \leq .05$ /a=Fisher test/ Chi-square SD: Standard Deviation - QR: Qatari Riyals

### 3.2. Psychometric properties of the scales

#### 3.2.1. Reliability

The internal consistency of the EPDS and BDI-II scales was calculated at  $\alpha = 0.865$  and  $0.90$  respectively. Using Lawshe's method, an expert panel of three clinicians evaluated the questionnaire for the necessity of items, their grammar, wording, and scaling. The necessity of each item was assessed using a 3-point rating scale: (a) not necessary, (b) useful but not essential, and (c) essential. The universal agreement between the three raters was 78% for the EPDS (intra-class correlation coefficient  $r = 0.78$  [CI 0.16-0.94]) and 59% for the BDI-II (intra-class correlation coefficient  $r = 0.59$  [CI 0.033-0.9]).

#### 3.2.2. Cut-offs

Based on Youden's index, the following cut-off scores were determined: A score  $\geq 13$  on the EPDS (87% sensitivity, 90% specificity) and  $\geq 19$  on the BDI-II (96% sensitivity, 73% specificity) (Table 2).

**Table 2:** The psychometric properties of the EPDS and BDI-II Scales

|        | Cut-off | Sensitivity | Specificity | Corrected classified | LR+  | LR-    | Youden's Index |
|--------|---------|-------------|-------------|----------------------|------|--------|----------------|
| EPDS   | ≥8      | 96%         | 64%         | 46.2%                | 2.66 | 0.062  | 60%            |
|        | ≥9      | 96%         | 68%         | 49.2%                | 3    | 0.0058 | 64%            |
|        | ≥10     | 96%         | 76%         | 55.6%                | 4    | 0.0052 | 72%            |
|        | ≥11     | 90%         | 83%         | 62.2%                | 5.29 | 0.12   | 73%            |
|        | ≥12     | 87%         | 88%         | 69.2%                | 7.25 | 0.15   | 75%            |
|        | ≥13     | 87%         | 90%         | 77.1%                | 8.7  | 0.14   | 77%            |
|        | ≥14     | 71%         | 99%         | 84.6%                | 17.3 | 0.29   | 71%            |
| BDI-II | ≥18     | 96%         | 63%         | 46%                  | 2.59 | 0.063  | 59%            |
|        | ≥19     | 96%         | 73%         | 51.7%                | 3.5  | 0.05   | 69%            |
|        | ≥20     | 90%         | 76%         | 53.8%                | 3.75 | 0.13   | 66%            |
|        | ≥21     | 90%         | 77%         | 54%                  | 3.9  | 0.12   | 67%            |
|        | ≥22     | 80%         | 80%         | 55.6%                | 4    | 0.25   | 60%            |
|        | ≥23     | 74%         | 82%         | 56.1%                | 4.1  | 0.31   | 56%            |
|        | ≥24     | 67%         | 84%         | 56.8%                | 4.18 | 0.39   | 51%            |

*Note:* EPDS: Edinburgh Postnatal Depression Scale; BDI-II: Beck Depression Inventory; LR: Likelihood ratio

### 3.2.3 Validity

Using ROC analysis, the area under the curve (AUC) was calculated at 0.951 (SE=0.02; 95%CI= 0.91-0.99) for EPDS and 0.912 (SE=0.025; 95%CI=0.86–0.96) for BDI (Figure 1).

### 3.2.4 Correlation

The correlation established between EPDS and BDI-II was 60% which represent a weak uphill linear correlation (Figure 2). Thus, the explained variance will be 36%.

### 3.2.5 Construct validity

Principle component analyses (PCA) was conducted for the EPDS and BDI-II scales (Figure 3). The analysis suggested that two components of the EPDS explain most of the variance with a cumulative percentage of 58%. The two components were item 2 (sadness) and item 8 (optimism). The convergent construct validity of EPDS was demonstrated through a rotated component matrix of 0.75, which is acceptable and significant (p=0.01). Discriminant



1  
2  
3 validity was supported because no violations were seen in the correlation matrix. Also, the  
4  
5 scree plot of the BDI-II suggests that four components explain most of the variance with a  
6  
7 cumulative percentage of 65.2%. These four factors were item 7 (self-dislike), item 2  
8  
9 (pessimistic), item 3 (past failure), and item 6 (punishment feeling). The convergent construct  
10  
11 validity of the BDI-II was weak as seen through a rotated component matrix of 0.45. No  
12  
13 violations were noted in the correlation matrix, hence supporting discriminant validity. The  
14  
15 Kaiser-Meyer-Olkin (KMO) values were considered for measuring sampling adequacy for  
16  
17 each factor analysis and it showed to be 0.872 ( $p < 0.001$ ).  
18  
19

20  
21 **Figure (1):** Receiving operating characteristic (ROC) curves of the EPDS and BDI-II scales

22  
23 **Figure (2):** Correlation between EPDS and BDI-II

24  
25 **Figure (3):** Scree plots of EPDS and BDI-II

## 26 27 28 **DISCUSSION**

29  
30 In the current study, a similar prevalence rate of antenatal depression was found through the  
31  
32 EPDS and MINI-interview tools at 27.3% and 24% respectively. However, the BDI -II  
33  
34 detected a higher prevalence at 45.3%. Overall, the EPDS was found to be superior to the  
35  
36 BDI-II because the positive predictive value of the former (0.75) was much higher than that  
37  
38 of the latter (0.54).  
39

40  
41 Given that the positive predictive value could be influenced by the actual prevalence of the  
42  
43 disease, the likelihood ratio was calculated and revealed that the EPDS had a higher positive  
44  
45 likelihood ratio, nearly triple that of the BDI-II. Additionally, the EPDS showed a higher  
46  
47 Youden's Index. So, the EPDS demonstrated a better performance and was the more useful  
48  
49 screening tool for antenatal depression in Qatar.  
50  
51

52  
53 The previously mentioned result is consistent with that of a systematic review on AD  
54  
55 screening instruments across low resource settings, which revealed an apparent superiority  
56  
57 for EPDS (AUC = 0.96) with a pooled sensitivity and specificity of 0.80 and 0.81  
58  
59 respectively.<sup>9</sup> Similarly, a meta-analysis on the reliability and validity of perinatal depression  
60

1  
2  
3 screening instruments for perinatal depression in African countries concluded that the EPDS  
4 was the most reliable and valid tool.<sup>30</sup> On the other hand, the current results oppose those  
5 reported from a similar validation study in Brazil, where the BDI-II was found to be the best-  
6 performing screening instrument (AUC=0.9) and showed higher accuracy than the EPDS  
7 (AUC=0.85).<sup>12</sup>

8  
9  
10  
11  
12  
13  
14 In addition to that, a key question was which cut-off point will reveal the maximum  
15 dichotomy between the depressed and non-depressed patients and result in further  
16 intervention. The current study revealed that the best cut-off value for the EPDS was  $\geq 13$ ,  
17 which is consistent with that obtained from studies in Saudi Arabia, Oman, and New  
18 Zealand.<sup>3,4,17</sup> Additionally, a score above 13 was identified as the optimal EPDS cut-off point  
19 by a recent study in Japan. On the other hand, the study yielded an area under the curve of  
20 0.956 as well as a sensitivity and specificity of 90% and 92.1% respectively.<sup>18</sup> whereas, an  
21 EPDS cut-off value  $\geq 9$  was the most optimal in African countries. The aforementioned value  
22 was associated with a pooled sensitivity and specificity of 0.94 and 0.77 respectively.<sup>30</sup>  
23  
24 Another study in Spain showed that EPDS cut-off value  $\geq 10$  (AUC of 0.76, sensitivity of  
25 72.4%, specificity of 79.3%, PPV of 18.2%, NPV of 97.8%, and OA of 78.9%).<sup>15</sup>

26  
27  
28  
29  
30  
31  
32  
33  
34  
35  
36  
37  
38  
39  
40 Regarding the BDI-II tool, the results showed that a cut-off value  $\geq 19$  distinguishes the most  
41 between depressed and non-depressed expecting mothers. In contrast, the previously  
42 mentioned validation study in Brazil determined that the optimal cut-off value was  $\geq 16$ .<sup>12</sup>  
43  
44 Also, a much lower BDI score (11/12) was identified as the optimal cut-off point among  
45 pregnant women in Taiwan, at which the sensitivity and the specificity were 74% and 83%  
46 respectively.<sup>31</sup> Such variation of results across different settings highlights the importance of  
47 validation studies to identify the most appropriate screening tool and associated cut-off value  
48 in each population.  
49  
50  
51  
52  
53  
54  
55  
56  
57  
58  
59  
60

1  
2  
3 In order to minimize the selection bias, the sample taken in this study included pregnant  
4 women during all trimesters of pregnancy in the first (21%), second (48%), and third (30%)  
5 trimester of pregnancy. This has been supported by the recommendation of the USPSTF  
6 which underlines the importance of screening pregnant women for antenatal depression  
7 regardless of their gestational age.<sup>7</sup> In addition to that, a study conducted in Saudi Arabia  
8 found an insignificant difference in the prevalence of antenatal depression across different  
9 trimesters.<sup>3</sup> However, a study conducted in Korea concluded that the highest prevalence of  
10 antenatal depression occurred during the third trimester (61.4%).<sup>14</sup> On the other hand, another  
11 study from Nigeria determined that the first trimester entailed the higher burden of antenatal  
12 depression with a prevalence of 27.5%.<sup>16</sup>

13  
14  
15 This was the first study in the State of Qatar to identify the most suitable screening tool for  
16 antenatal depression. The study sample in the current study was derived from a  
17 heterogeneous population of pregnant women, regardless the gestational age, attending nine  
18 primary health centers across the country. Furthermore, the investigators were blinded to the  
19 results to avoid any interviewer bias. Also, the examined screening tools in the study were  
20 compared with the golden standard tool (MINI). Similarly, the construct validity of the EPDS  
21 has been demonstrated in the current study. The aforementioned factors allow for the  
22 universal administration of the EPDS as a screening tool in Qatar's primary health care  
23 setting. One of the limitations in this study was the inability to use the Structured Clinical  
24 Interview for DSM-5 (SCID-5) as a tool for diagnosing antenatal depression.<sup>32</sup> The reason  
25 behind this was the need for lengthy appointments, which was not feasible because such  
26 action will interrupt the general workflow at the antenatal care clinic of the primary health  
27 care center.

28  
29  
30 In conclusion, the current study shows that the EPDS is superior to BDI-II as an antenatal  
31 depression screening tool at the primary health care level in Qatar. The EPDS was found to  
32

1  
2  
3 have better psychometric properties in comparison to the BDI-II tool. Ultimately, the proper  
4 use of the aforementioned screening tools along with their cut-off values will help in the early  
5 identification of AD among pregnant women in Qatar. As a result, such step will help raise  
6 awareness about antenatal depression and alleviate some of its burden in the country.  
7  
8  
9  
10  
11  
12

### 13 **Acknowledgments**

14  
15  
16 The publication of this article was funded by the Qatar National Library.  
17  
18

### 19 **Competing Interests**

20  
21  
22 The authors declare no conflict of interest.  
23  
24

### 25 **Funding**

26  
27  
28 None.  
29  
30

### 31 **Ethical**

32  
33  
34  
35 This study was approved by the Institutional Review Board of the Primary Health Care  
36 Corporation under protocol ID (PHCC/RC/18/06/002).  
37  
38  
39

### 40 **Author contributor ship**

41  
42  
43 SN designed the study, performed the statistical analysis, interpretation of the results and  
44 drafted the manuscript. NAK and IB helped in designing the study. MC and AA helped in  
45 data analysis and participated in the preparation of the manuscript. NA helped in data  
46 collection, entry, and interpretation. All authors revised and approved the final version of the  
47 manuscript. Each author contributed important intellectual content during manuscript drafting  
48 or revision and accepts accountability for the overall work by ensuring that questions  
49 pertaining to the accuracy or integrity of any portion of the work are appropriately  
50 investigated and resolved.  
51  
52  
53  
54  
55  
56  
57  
58  
59  
60

1  
2  
3  
4  
5  
6  
7  
8  
9  
10  
11  
12  
13  
14  
15  
16  
17  
18  
19  
20  
21  
22  
23  
24  
25  
26  
27  
28  
29  
30  
31  
32  
33  
34  
35  
36  
37  
38  
39  
40  
41  
42  
43  
44  
45  
46  
47  
48  
49  
50  
51  
52  
53  
54  
55  
56  
57  
58  
59  
60

**Data sharing**

All data relevant to the study are included in the article.

For peer review only

## References

1. Cohen N. Public health perspectives on depressive disorders. Baltimore: John Hopkins University, 2017:281.
2. World Health Organization (WHO). WHO Maternal mental health. WHO; 2017. Available from: [http://www.who.int/mental\\_health/maternal-child/maternal\\_mental\\_health/en/](http://www.who.int/mental_health/maternal-child/maternal_mental_health/en/)[accessed 17 April 2018]
3. Alotaibe H, Elsaid T, Almomen R. The prevalence and risk factors for antenatal depression among pregnant women attending clinics in Riyadh, Saudi Arabia. *EJPMR* 2016;3:60-67 .
4. Al-Azri M, Al-Lawati I, Al-Kamyani R, et al. Prevalence and Risk Factors of Antenatal Depression among Omani Women in a Primary Care Setting: Cross-sectional study. *Sultan Qaboos Univ Med J* 2016;16:e35-41.
5. World health Organization (WHO). Thinking healthy a manual for psychosocial management for perinatal depression. WHO; 2015. Available from: [http://apps.who.int/iris/bitstream/10665/152936/1/WHO\\_MSD\\_MER\\_15.1\\_eng.pdf?ua=1&ua=1](http://apps.who.int/iris/bitstream/10665/152936/1/WHO_MSD_MER_15.1_eng.pdf?ua=1&ua=1)[accessed 17 April 2018]
6. World Health Organization (WHO). WHO Interventions for common perinatal mental disorders in women in low- and middle-income countries: a systematic review and meta-analysis .WHO; 2013. Available from: <http://www.who.int/bulletin/volumes/91/8/12-109819/en/> [accessed 31 December 2018].
7. O'Connor E, Rossom R, Henninger M, et al. Primary Care Screening for and Treatment of Depression in Pregnant and Postpartum Women. *JAMA* 2016;315:388.
8. Siu A, Bibbins-Domingo K, Grossman D, et al. Screening for Depression in Adults. *JAMA* 2016;315:380.
9. Chorwe-Sungani G, Chipps J. A systematic review of screening instruments for depression for use in antenatal services in low resource settings. *BMC Psychiatry* 2017;17.
10. Yonkers K, Smith M, Gotman N, et al. Typical somatic symptoms of pregnancy and their impact on a diagnosis of major depressive disorder. *Gen Hosp Psychiatry* 2009;31:327-333.
11. Nylen K, Williamson J, O'Hara M, et al. Validity of somatic symptoms as indicators of depression in pregnancy. *Arch Womens Ment Health* 2013;16:203-210.
12. Castro e Couto T, Martins Brancaglioni M, Nogueira Cardoso M, et al. What is the best tool for screening antenatal depression?. *J Affect Disord* 2015;178:12-17.
13. Lholcombjr W, Sstone L, Jlustman P, et al. Screening for depression in pregnancy: Characteristics of the Beck Depression Inventory. *Obstet Gynecol* 1996;88:1021-1025.
14. Park J, Karmaus W, Zhang H. Prevalence of and Risk Factors for Depressive Symptoms in Korean Women throughout Pregnancy and in Postpartum Period. *Asian Nurs Res* 2015;9:219-225.
15. Vázquez MB, Míguez MC. Validation of the Edinburgh postnatal depression scale as a screening tool for depression in Spanish pregnant women. *Journal of Affective Disorders*. 2019; 246:515-521.
16. Thompson O, Ajayi I. Prevalence of Antenatal Depression and Associated Risk Factors among Pregnant Women Attending Antenatal Clinics in Abeokuta North Local Government Area, Nigeria. *Depress Res Treat* 2016;1-15.
17. Waldie K, Peterson E, D'Souza S, et al. Depression symptoms during pregnancy: Evidence from Growing Up in New Zealand. *J Affect Disord* 2015;186:66-73.

18. Usuda K, Nishi D, Okazaki E, et al. Optimal cut-off score of the Edinburgh Postnatal Depression Scale for major depressive episode during pregnancy in Japan. *Psychiatry Clin Neurosci* 2017;71:836-842.
19. Ministry of public health (MOPH). Qatar health report 2013. Qatar: MOPH;2013.
20. Qatar Statistics Authority (QSA). Planning and Statistics Authority (PSA). .Qatar statistics authority Census; 2010.; Available:www.qsa.gov.qa. [cited2018May 29]
21. Ministry of Public Health (MOPH). Qatar National Health Strategy 2018-2022. MOPH; P10-14.
22. Primary Health Care Corporation (PHCC). Corporate Strategic Plan 2019-2023.PHCC;2019.
23. Primary Health Care Corporation (PHCC). Antenatal Care Report. Doha: Primary Health Care Corporation. PHCC; 2012.
24. Mathers N, Fox N, Hunn A. Surveys and Questionnaires. The NIHR RDS for the East Midlands / Yorkshire & the Humber. The NIHR Research Design Service for Yorkshire & the Humber 2007.
25. Cox JL, Holden JM, Segovsky R. Detection of postnatal depression: Development of the 10-item Edinburgh Postnatal Depression Scale. *Br J Psychiatry* 1987;150:782-786.
26. Hendrick V. Psychiatric Disorders in Pregnancy and the Postpartum. Dordrecht: Springer 2008:14.
27. Sheehan D, Lecrubier Y, Harnett Sheehan K, et al. The validity of the Mini International Neuropsychiatric Interview (MINI) according to the SCID-P and its reliability. *Eur Psychiatry* 1997;12:232-241.
28. Onah M, Field S, Bantjes J, et al. Perinatal suicidal ideation and behaviour: psychiatry and adversity. *Arch Women's Ment Health* 2016;20:321-331.
29. Pettersson A, Modin S, Wahlström R, et al. The Mini-International Neuropsychiatric Interview is useful and well accepted as part of the clinical assessment for depression and anxiety in primary care: a mixed-methods study. *BMC Fam Pract* 2018;19.
30. Tsai A, Scott J, Hung K, et al. Reliability and Validity of Instruments for Assessing Perinatal Depression in African Settings: Systematic Review and Meta-Analysis. *PLoS ONE* 2013;8:e82521.
31. Su K, Chiu T, Huang C, et al. Different cutoff points for different trimesters? The use of Edinburgh Postnatal Depression Scale and Beck Depression Inventory to screen for depression in pregnant Taiwanese women. *Gen Hosp Psychiatry* 2007;29:436-441.
32. American Psychiatry Association (APA).Structured Clinical Interview for DSM-5 (SCID-5) .Appi.org. 2017 Available from: <https://www.appi.org/products/structured-clinical-interview-for-dsm-5-scid-5>[accessed 25 December 2018].



Diagonal segments are produced by ties.

Figure (1): Receiving operating characteristic (ROC) curves of the EPDS and BDI-II scales



1  
2  
3  
4  
5  
6  
7  
8  
9  
10  
11  
12  
13  
14  
15  
16  
17  
18  
19  
20  
21  
22  
23  
24  
25  
26  
27  
28  
29  
30  
31  
32  
33  
34  
35  
36  
37  
38  
39  
40  
41  
42  
43  
44  
45  
46  
47  
48  
49  
50  
51  
52  
53  
54  
55  
56  
57  
58  
59  
60



Figure (2): Correlation graph of the EPDS and BDI-II scales

69x56mm (300 x 300 DPI)



Figure (3): Scree plots of the EPDS and BDI-II scales
